# Supplementary material for: Maternal smoking during pregnancy and fractures in offspring: national register based sibling comparison study
Source: PubMed Central journal article supplement — BMJ. 2020 Jan 29;368:l7057. doi: 10.1136/bmj.l7057 (PMC7190030; doi:10.1136/bmj.l7057), 2020-01-29
Supplement: braj052142.ww1.pdf [file braj052142.ww1.pdf]

**Supplementary Figure 1.** Flow chart of the study population.

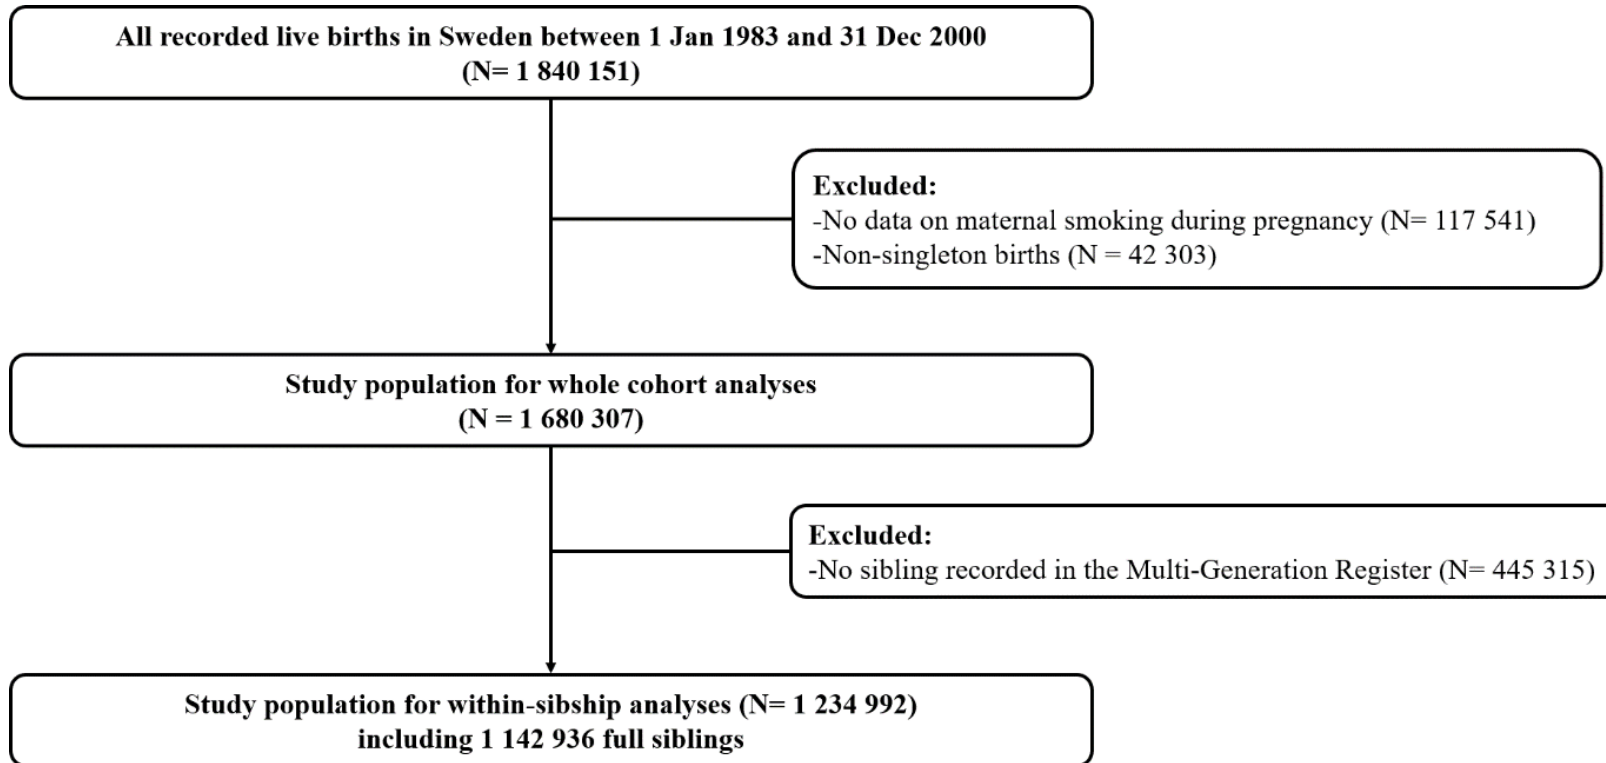

**Supplementary Figure 2.** Standardised incidence rates of bone fractures by attained age in male and female offspring exposed and unexposed to maternal smoking during pregnancy.

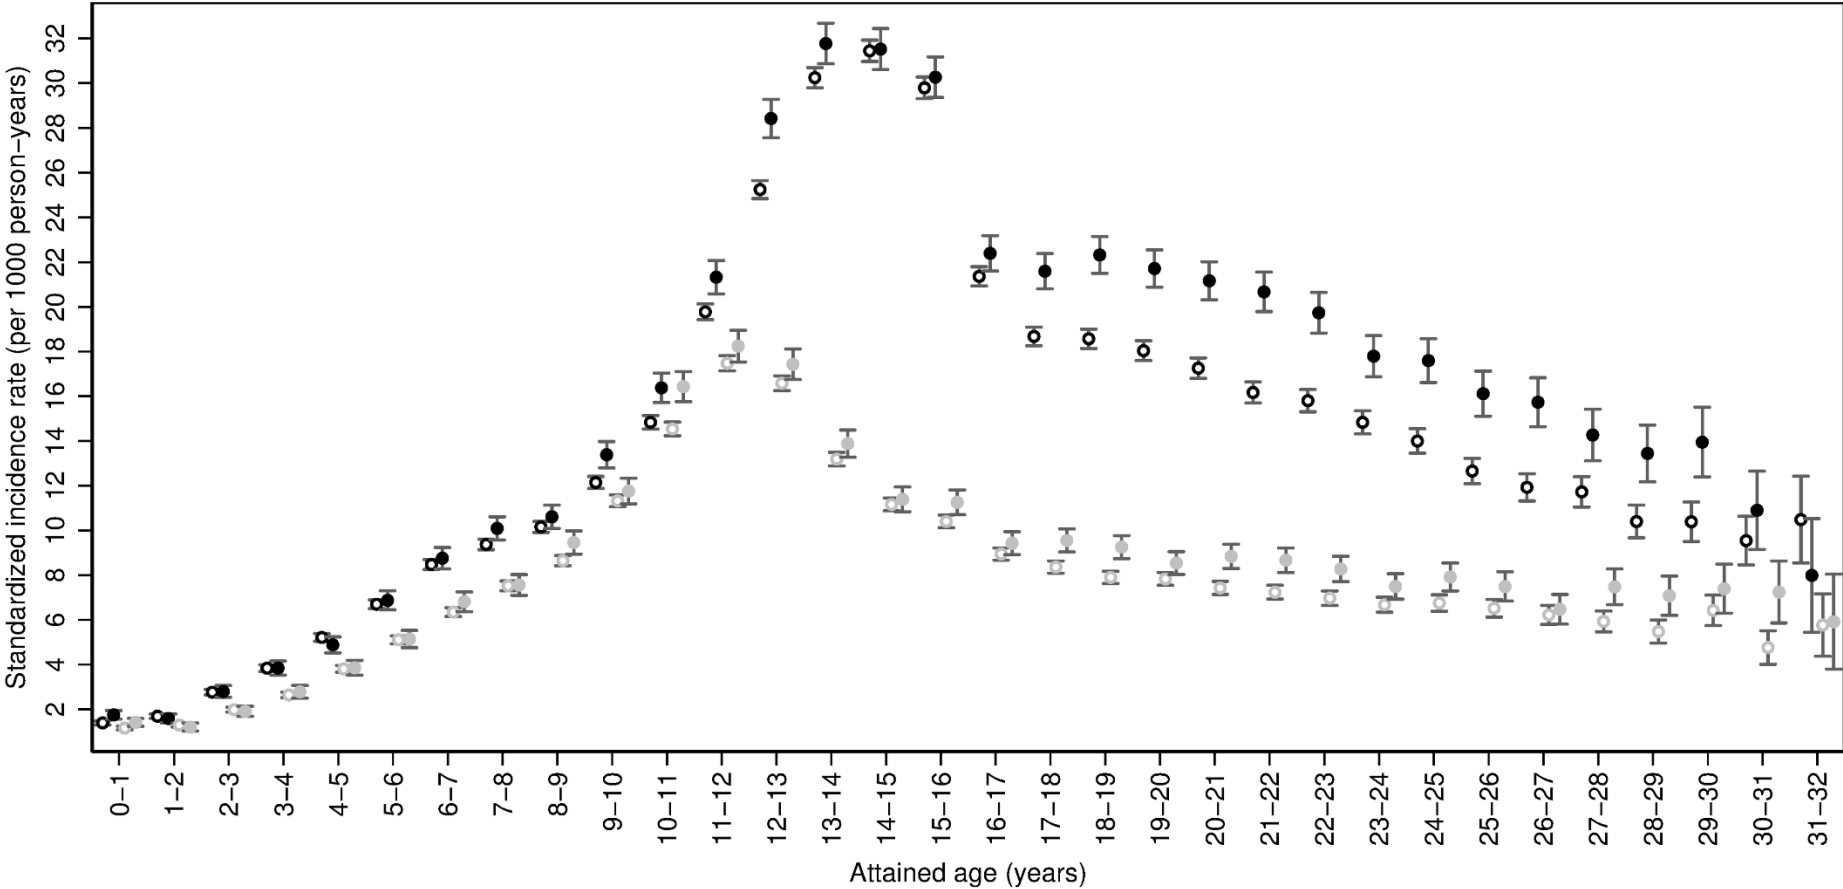

Incidence rates (per 1000 person-years) are standardised by calendar year of birth and stratified by attained age in males (black circles) and females (grey circles) separately. Incidence rates (95% confidence intervals) of fractures in offspring are for those whose mothers did smoke (filled circles) and did not smoke (open circles) during pregnancy.

**Supplementary Methods**

### Description of Swedish registers used in this study

For this study, the data are from national Swedish registers. Each resident in Sweden is assigned a unique personal identification number which allows data linkage across the registers used here. The Medical Birth Register includes maternal, obstetric and neonatal data for > 98% of all births in Sweden since 1973.<sup>1</sup> The Multi-Generation Register includes information on familial relationships for all individuals born since 1932, such that siblings, parents and offspring can be identified.<sup>2</sup> The Total Population Register includes dates of birth, death, and migration since 1915.<sup>3</sup> The Cause of Death Register is a virtually complete register of all deaths in Sweden since 1961.<sup>4</sup> The National Patient Register was established in 1964 and has covered all inpatient hospital admissions since 1987 and outpatient physician visits since 2001.<sup>5</sup> Diagnoses in the National Patient Register are coded according to Swedish versions of the International Classification of Diseases (ICD-8 from 1969 to 1986, ICD-9 from 1987 to 1996 and ICD-10 since 1997) and have been demonstrated to be of high validity with the reported positive predictive value for most diagnoses of 85-95%.<sup>5</sup> Socioeconomic variables are registered in LISA (the Swedish acronym for the Longitudinal Integration Database for Health Insurance and Labour Market Studies),<sup>6</sup> which is managed by Statistics Sweden. Using these data sources, we identified 1 680 307 singleton live births in Sweden between 1 January 1987 and 31 December 2000 with complete data on maternal smoking during pregnancy. For the sibling comparison analysis, we used a subset of the cohort comprising 1 234 992 individuals born to 531 884 mothers identified through the Multi-Generation Register. Follow-up in this cohort was up until 31 December 2014.

### Analyses

The following variables were included as potential confounders in whole cohort analyses: year of birth (1983, 1984, 1985, 1986, 1987, 1988, 1989, 1990, 1991, 1992, 1993, 1994, 1995, 1996, 1997, 1998, 1999, 2000), sex, maternal age at birth (< 20, 20-24, 25-29, 30-34,  $\geq 35$  years), maternal height (< 155, 155-164, 165-174,  $\geq 175$  cm), maternal body mass index (< 18.5, 18.5-24.9, 25.0-29.9,  $\geq 30.0$  kg/m<sup>2</sup>), maternal parity (at the time of the index pregnancy, nulliparous, 1, 2,  $\geq 3$ ), maternal educational level (compulsory up to 9 years, secondary, post-secondary), maternal occupational classification (low, intermediate, high), parental marital status (unmarried, married, divorced/widow), paternal educational level (compulsory up to 9 years, secondary, post-secondary), paternal occupational classification (low, intermediate, high). We used stratified Cox models with a separate stratum for each family identifier to obtain within-sibship estimates. These within-sibship analyses were adjusted for the same covariates as the multivariable analysis in the whole cohort but excluding maternal height, a variable that is unlikely to vary among siblings in the same family.

To explore the extent to which associations were explained by small size at birth, models were additionally adjusted for gestational age at birth (in weeks) and birth weight for gestational age (in percentiles).

#### Handling of missing covariate data

In total, 569 526 offspring (34%) had missing data on one or more covariates, which was mainly due to missing information on early pregnancy maternal BMI and height (31%). This is because maternal weight and height were not routinely recorded in women who were pregnant before 1992. Primary analyses were based on complete case data, but we also conducted sensitivity analyses with multiple imputation of missing covariate data. Missing covariate data were imputed under the ‘missing at random assumption’ using multivariate multiple imputation with chained equations <sup>7</sup>, and 10 imputed datasets were generated. The imputation model included the exposure (no daily smoking, < 10 cigarettes/day,  $\geq 10$  cigarettes/day), the outcome (i.e. Nelson-Aalen estimator of the baseline cumulative hazard and event indicator), all covariates included in the multivariable adjusted model (i.e. birth year, offspring sex, maternal age, parity,

height, body mass index, parental education, occupation and marital status) and other predictors that were not included in the main analysis model but were associated with some missing data (gestational age at birth and birth weight for gestational age).

## References

- 1 National Board of Health and Welfare. The Swedish Medical Birth Register - A summary of Content and Quality. Stockholm: Centre for Epidemiology, 2003. <https://www.socialstyrelsen.se/en/statistics-and-data/registers/register-information/the-swedish-medical-birth-register/> accessed 29 November 2019.
- 2 Ekblom A. The Swedish Multi-generation Register. *Methods Mol Biol* 2011;675:215-20 doi:10.1007/978-1-59745-423-0\_10 [doi].
- 3 Ludvigsson JF, Almqvist C, Bonamy AK, et al. Registers of the Swedish total population and their use in medical research. *Eur J Epidemiol* 2016;31:125-36 doi:10.1007/s10654-016-0117-y [doi].
- 4 Brooke HL, Talback M, Hornblad J, et al. The Swedish cause of death register. *Eur J Epidemiol* 2017;32:765-73 doi:10.1007/s10654-017-0316-1 [doi].
- 5 Ludvigsson JF, Andersson E, Ekblom A, et al. External review and validation of the Swedish national inpatient register. *BMC Public Health* 2011;11:450,2458-11-450 doi:10.1186/1471-2458-11-450 [doi].
- 6 Ludvigsson JF, Svedberg P, Olen O, et al. The longitudinal integrated database for health insurance and labour market studies (LISA) and its use in medical research. *Eur J Epidemiol* 2019;34:423-37 doi:10.1007/s10654-019-00511-8 [doi].
- 7 White IR, Royston P. Imputing missing covariate values for the Cox model. *Stat Med* 2009;28:1982-98 doi:10.1002/sim.3618 [doi].

**Supplementary Table 1.** International classification of diseases (ICD) codes for bone fractures.

| <b>ICD-8 and 9</b> | <b>Description</b>                                                                                              |
|--------------------|-----------------------------------------------------------------------------------------------------------------|
| 800-804            | Fracture of skull and facial bones                                                                              |
| 805-806            | Fracture of vertebral column                                                                                    |
| 807                | Fracture of rib(s), sternum, larynx, and trachea                                                                |
| 808                | Fracture of pelvis                                                                                              |
| 809                | Ill-defined fractures of bones of trunk                                                                         |
| 810                | Fracture of clavicle                                                                                            |
| 811                | Fracture of scapula                                                                                             |
| 812                | Fracture of humerus                                                                                             |
| 813                | Fracture of radius and ulna                                                                                     |
| 814                | Fracture of carpal bone(s)                                                                                      |
| 815                | Fracture of metacarpal bone(s)                                                                                  |
| 816                | Fracture of one or more phalanges of the hand                                                                   |
| 817                | Multiple fractures of hand bones                                                                                |
| 818                | Ill-defined fractures of upper limb                                                                             |
| 819                | Multiple fractures involving both upper limbs, and upper limb with rib(s) and sternum                           |
| 820-821            | Fracture of femur                                                                                               |
| 822                | Fracture of patella                                                                                             |
| 823                | Fracture of tibia and fibula                                                                                    |
| 824                | Fracture of ankle                                                                                               |
| 825                | Fracture of one or more tarsal and metatarsal bones                                                             |
| 826                | Fracture of one or more phalanges of foot                                                                       |
| 827                | Other, multiple, and ill-defined fractures of lower limb                                                        |
| 828                | Multiple fractures involving both lower limbs, lower with upper limb, and lower limb(s) with rib(s) and sternum |
| 829                | Fracture of unspecified bones                                                                                   |
|                    |                                                                                                                 |
| <b>ICD-10</b>      | <b>Description</b>                                                                                              |
| S02                | Fracture of skull and facial bones                                                                              |
| S12                | Fracture of neck                                                                                                |
| S22                | Fracture of rib(s), sternum and thoracic spine                                                                  |
| S32                | Fracture of lumbar spine and pelvis                                                                             |
| S42                | Fracture of shoulder and upper arm including humerus                                                            |
| S52                | Fracture of forearm including radius and ulna                                                                   |

|     |                                                                    |
|-----|--------------------------------------------------------------------|
| S62 | Fracture at wrist and hand level                                   |
| S72 | Fracture of femur                                                  |
| S82 | Fracture of lower leg including ankle (including tibia and fibula) |
| S92 | Fracture of foot, except ankle                                     |
| T02 | Fractures involving multiple body regions                          |
| T08 | Fracture of spine, level unspecified                               |
| T10 | Fracture of upper limb, level unspecified                          |
| T12 | Fracture of lower limb, level unspecified                          |

**Supplementary Table 2.** Diagnostic codes for bone fractures by anatomical site and mechanism of injury.

| <b>Fractures</b>             | <b>ICD-8-9</b>                                                                | <b>ICD-10</b>                                                                 |
|------------------------------|-------------------------------------------------------------------------------|-------------------------------------------------------------------------------|
| <b>Anatomical site</b>       |                                                                               |                                                                               |
| Skull and face               | 800-804                                                                       | S02                                                                           |
| Neck and trunk               | 805-809                                                                       | S12, S22, S32, T08                                                            |
| Upper extremity              | 810-818                                                                       | S42, S52, S62, T10                                                            |
| -shoulder and upper arm      | 810-812                                                                       | S42                                                                           |
| -forearm                     | 813                                                                           | S52                                                                           |
| -wrist and hand              | 814-817                                                                       | S62                                                                           |
| -unspecified                 | 818                                                                           | T10                                                                           |
| Lower extremity              | 820-827                                                                       | S72, S82, S92, T12                                                            |
| -femur                       | 820-821                                                                       | S72                                                                           |
| -lower leg and ankle         | 822-824                                                                       | S82                                                                           |
| -foot                        | 825-826                                                                       | S92                                                                           |
| -unspecified                 | 827                                                                           | T12                                                                           |
| Other                        | 819, 828, 829                                                                 | T02                                                                           |
| <b>Mechanism of injury *</b> |                                                                               |                                                                               |
| Non-intentional              | E80-E92                                                                       | V01-V99, W00-X59                                                              |
| Assault                      | E96                                                                           | X85-X99, Y00-Y09                                                              |
| Other                        | Any external cause code except those listed under non-intentional and assault | Any external cause code except those listed under non-intentional and assault |

\*External cause codes for defining the mechanism of injury are not available for fractures recorded in the Medical Birth Register.



**Supplementary Table 3.** Bone fractures by anatomical site and mechanism of injury in all offspring and those with and without siblings, overall and stratified by attained age.

|                                            | N (%)         |             |              |               |               |
|--------------------------------------------|---------------|-------------|--------------|---------------|---------------|
|                                            | Overall       | 0 to < 1 yr | 1 to < 5 yrs | 5 to < 15 yrs | ≥ 15 yrs      |
| <b>Fractures – all offspring</b>           |               |             |              |               |               |
| <b>Anatomical site</b>                     |               |             |              |               |               |
| Skull and face                             | 27480 (7.3)   | 1176 (52.2) | 1308 (6.9)   | 7471 (3.5)    | 17525 (12.0)  |
| Neck and trunk                             | 12241 (3.2)   | 52 (2.3)    | 155 (0.8)    | 3132 (1.5)    | 8902 (6.1)    |
| Upper extremity                            |               |             |              |               |               |
| -shoulder and upper arm                    | 47724 (12.6)  | 309 (13.7)  | 4978 (26.1)  | 29926 (14.2)  | 12511 (8.6)   |
| -forearm                                   | 91049 (24.1)  | 30 (1.3)    | 3833 (20.1)  | 65906 (31.2)  | 21280 (14.6)  |
| -wrist and hand                            | 89678 (23.7)  | 34 (1.5)    | 1146 (6.0)   | 43726 (20.7)  | 44772 (30.8)  |
| -unspecified                               | 132 (0.0)     | 8 (0.4)     | 28 (0.1)     | 66 (0.0)      | 30 (0.0)      |
| Lower extremity                            |               |             |              |               |               |
| -femur                                     | 6997 (1.9)    | 468 (20.8)  | 2095 (11.0)  | 2955 (1.4)    | 1479 (1.0)    |
| -lower leg and ankle                       | 43495 (11.5)  | 92 (4.1)    | 3137 (16.4)  | 22367 (10.6)  | 17899 (12.3)  |
| -foot                                      | 33316 (8.8)   | 3 (0.1)     | 892 (4.7)    | 16333 (7.7)   | 16088 (11.1)  |
| -unspecified                               | 66 (0.0)      | 3 (0.1)     | 18 (0.1)     | 31 (0.0)      | 14 (0.0)      |
| Other                                      | 25792 (6.8)   | 78 (3.5)    | 1488 (7.8)   | 19148 (9.1)   | 5078 (3.5)    |
| <b>Mechanism of injury *</b>               |               |             |              |               |               |
| Non-intentional                            | 322246 (85.3) | 1791 (79.5) | 15831 (83.0) | 177620 (84.2) | 127004 (87.2) |
| Assault                                    | 6387 (1.7)    | 43 (1.9)    | 17 (0.1)     | 438 (0.2)     | 5889 (4.0)    |
| Other                                      | 46993 (12.4)  | 76 (3.4)    | 2877 (15.1)  | 31638 (15.0)  | 12402 (8.5)   |
| Unknown                                    | 2344 (0.6)    | 343 (15.2)  | 353 (1.9)    | 1365 (0.6)    | 283 (0.2)     |
|                                            |               |             |              |               |               |
| <b>Fractures – offspring with siblings</b> |               |             |              |               |               |
| <b>Anatomical site</b>                     |               |             |              |               |               |
| Skull and face                             | 20379 (7.2)   | 876 (52.2)  | 946 (7.2)    | 5614 (3.5)    | 12943 (11.8)  |
| Neck and trunk                             | 9019 (3.2)    | 34 (2.0)    | 115 (0.9)    | 2310 (1.4)    | 6560 (6.0)    |
| Upper extremity                            |               |             |              |               |               |
| -shoulder and upper arm                    | 35756 (12.6)  | 227 (13.5)  | 3319 (25.2)  | 22528 (14.1)  | 9682 (8.8)    |
| -forearm                                   | 68886 (24.2)  | 20 (1.2)    | 2587 (19.7)  | 49959 (31.2)  | 16320 (14.9)  |
| -wrist and hand                            | 68265 (24.0)  | 30 (1.8)    | 798 (6.1)    | 33793 (21.1)  | 33644 (30.7)  |
| -unspecified                               | 98 (0.0)      | 6 (0.4)     | 22 (0.2)     | 46 (0.0)      | 24 (0.0)      |
| Lower extremity                            |               |             |              |               |               |
| -femur                                     | 5222 (1.8)    | 356 (21.2)  | 1579 (12.0)  | 2155 (1.3)    | 1132 (1.0)    |
| -lower leg and ankle                       | 32473 (11.4)  | 72 (4.3)    | 2174 (16.5)  | 16753 (10.5)  | 13474 (12.3)  |
| -foot                                      | 24838 (8.7)   | 2 (0.1)     | 567 (4.3)    | 12325 (7.7)   | 11944 (10.9)  |
| -unspecified                               | 47 (0.0)      | 3 (0.2)     | 11 (0.1)     | 24 (0.0)      | 9 (0.0)       |
| Other                                      | 19550 (6.9)   | 51 (3.0)    | 1039 (7.9)   | 14668 (9.2)   | 3792 (3.5)    |
| <b>Mechanism of injury *</b>               |               |             |              |               |               |
| Non-intentional                            | 242927 (85.4) | 1338 (79.8) | 11180 (85.0) | 134346 (83.9) | 96063 (87.7)  |
| Assault                                    | 4737 (1.7)    | 24 (1.4)    | 12 (0.1)     | 341 (0.2)     | 4360 (4.0)    |
| Other                                      | 35131 (12.3)  | 54 (3.2)    | 1713 (13.0)  | 24455 (15.3)  | 8909 (8.1)    |
| Unknown                                    | 1738 (0.6)    | 261 (15.6)  | 252 (1.9)    | 1033 (0.6)    | 192 (0.2)     |

**Supplementary Table 3. Continued**

|                                               | N (%)        |             |              |               |              |
|-----------------------------------------------|--------------|-------------|--------------|---------------|--------------|
|                                               | Overall      | 0 to < 1 yr | 1 to < 5 yrs | 5 to < 15 yrs | ≥ 15 yrs     |
| <b>Fractures – offspring without siblings</b> |              |             |              |               |              |
| <b>Anatomical site</b>                        |              |             |              |               |              |
| Skull and face                                | 7101 (7.6)   | 300 (52.1)  | 362 (6.1)    | 1857 (3.6)    | 4582 (12.7)  |
| Neck and trunk                                | 3222 (3.4)   | 18 (3.1)    | 40 (0.7)     | 822 (1.6)     | 2342 (6.5)   |
| Upper extremity                               |              |             |              |               |              |
| -shoulder and upper arm                       | 11968 (12.8) | 82 (14.2)   | 1659 (28.0)  | 7398 (14.5)   | 2829 (7.8)   |
| -forearm                                      | 22163 (23.7) | 10 (1.7)    | 1246 (21.0)  | 15947 (31.3)  | 4960 (13.8)  |
| -wrist and hand                               | 21413 (22.9) | 4 (0.7)     | 348 (5.9)    | 9933 (19.5)   | 11128 (30.9) |
| -unspecified                                  | 34 (0.0)     | 2 (0.3)     | 6 (0.1)      | 20 (0.0)      | 6 (0.0)      |
| Lower extremity                               |              |             |              |               |              |
| -femur                                        | 1775 (1.9)   | 112 (19.4)  | 516 (8.7)    | 800 (1.6)     | 347 (1.0)    |
| -lower leg and ankle                          | 11022 (11.8) | 20 (3.5)    | 963 (16.3)   | 5614 (11.0)   | 4425 (12.3)  |
| -foot                                         | 8478 (9.1)   | 1 (0.2)     | 325 (5.5)    | 4008 (7.9)    | 4144 (11.5)  |
| -unspecified                                  | 19 (0.0)     | 0 (0)       | 7 (0.1)      | 7 (0.0)       | 5 (0.0)      |
| Other                                         | 6242 (6.7)   | 27 (4.7)    | 449 (7.6)    | 4480 (8.8)    | 1286 (3.6)   |
| <b>Mechanism of injury *</b>                  |              |             |              |               |              |
| Non-intentional                               | 79319 (84.9) | 453 (78.6)  | 4651 (78.6)  | 43274 (85.0)  | 30941 (85.8) |
| Assault                                       | 1650 (1.8)   | 19 (3.3)    | 5 (0.1)      | 97 (0.2)      | 1529 (4.2)   |
| Other                                         | 11862 (12.7) | 22 (3.8)    | 1164 (19.7)  | 7183 (14.1)   | 3493 (9.7)   |
| Unknown                                       | 606 (0.6)    | 82 (14.2)   | 101 (1.7)    | 332 (0.7)     | 91 (0.3)     |

Values are numbers (percentages) unless stated otherwise.

\*External cause codes for defining the mechanism of injury are not available for fractures recorded in the Medical Birth Register. The unknown category of mechanism of injury includes fractures without external cause code in the Medical Birth Register (i.e. all diagnoses recorded in this register) or the Patient Register.

**Supplementary Table 4.** Standardised incidence rates of bone fractures in offspring by attained age, overall and stratified by maternal smoking during pregnancy.

| Attained age  | IR per 1000 person-years (95% CI) |                        |                        | IRR (95% CI)        |
|---------------|-----------------------------------|------------------------|------------------------|---------------------|
|               | All                               | No smoking             | Smoking                |                     |
| 0 to <1 yr    | 1.35 (1.29 to 1.40)               | 1.28 (1.22 to 1.34)    | 1.59 (1.46 to 1.72)    | 1.24 (1.13 to 1.36) |
| 1 to <2 yrs   | 1.48 (1.42 to 1.54)               | 1.50 (1.43 to 1.57)    | 1.40 (1.27 to 1.54)    | 0.94 (0.84 to 1.04) |
| 2 to <3 yrs   | 2.38 (2.31 to 2.46)               | 2.39 (2.30 to 2.47)    | 2.37 (2.19 to 2.54)    | 0.99 (0.91 to 1.08) |
| 3 to <4 yrs   | 3.27 (3.18 to 3.36)               | 3.26 (3.16 to 3.35)    | 3.33 (3.12 to 3.54)    | 1.02 (0.95 to 1.10) |
| 4 to <5 yrs   | 4.50 (4.40 to 4.61)               | 4.53 (4.42 to 4.65)    | 4.38 (4.14 to 4.63)    | 0.97 (0.91 to 1.03) |
| 5 to <6 yrs   | 5.94 (5.82 to 6.06)               | 5.92 (5.79 to 6.06)    | 6.03 (5.75 to 6.32)    | 1.02 (0.97 to 1.07) |
| 6 to <7 yrs   | 7.50 (7.37 to 7.64)               | 7.44 (7.29 to 7.58)    | 7.81 (7.48 to 8.14)    | 1.05 (1.00 to 1.10) |
| 7 to <8 yrs   | 8.54 (8.39 to 8.68)               | 8.47 (8.31 to 8.63)    | 8.86 (8.51 to 9.21)    | 1.05 (1.00 to 1.09) |
| 8 to <9 yrs   | 9.53 (9.38 to 9.69)               | 9.42 (9.25 to 9.59)    | 10.05 (9.68 to 10.42)  | 1.07 (1.02 to 1.11) |
| 9 to <10 yrs  | 11.90 (11.73 to 12.07)            | 11.74 (11.55 to 11.93) | 12.59 (12.18 to 13.01) | 1.07 (1.03 to 1.11) |
| 10 to <11 yrs | 15.02 (14.82 to 15.21)            | 14.69 (14.48 to 14.90) | 16.40 (15.93 to 16.87) | 1.12 (1.08 to 1.15) |
| 11 to <12 yrs | 18.88 (18.66 to 19.10)            | 18.65 (18.40 to 18.89) | 19.82 (19.30 to 20.33) | 1.06 (1.03 to 1.09) |
| 12 to <13 yrs | 21.40 (21.16 to 21.64)            | 20.99 (20.73 to 21.25) | 23.03 (22.48 to 23.58) | 1.10 (1.07 to 1.13) |
| 13 to <14 yrs | 22.04 (21.80 to 22.28)            | 21.81 (21.54 to 22.08) | 22.92 (22.37 to 23.47) | 1.05 (1.02 to 1.08) |
| 14 to <15 yrs | 21.35 (21.10 to 21.60)            | 21.32 (21.04 to 21.60) | 21.46 (20.92 to 21.99) | 1.01 (0.98 to 1.04) |
| 15 to <16 yrs | 20.17 (19.92 to 20.42)            | 20.02 (19.74 to 20.30) | 20.67 (20.14 to 21.20) | 1.03 (1.00 to 1.06) |
| 16 to <17 yrs | 15.23 (15.01 to 15.46)            | 15.06 (14.81 to 15.31) | 15.80 (15.34 to 16.27) | 1.05 (1.01 to 1.09) |
| 17 to <18 yrs | 13.91 (13.69 to 14.13)            | 13.42 (13.17 to 13.67) | 15.44 (14.97 to 15.91) | 1.15 (1.11 to 1.19) |
| 18 to <19 yrs | 13.73 (13.50 to 13.95)            | 13.11 (12.85 to 13.36) | 15.61 (15.13 to 16.09) | 1.19 (1.15 to 1.23) |
| 19 to <20 yrs | 13.34 (13.11 to 13.57)            | 12.79 (12.53 to 13.06) | 14.92 (14.44 to 15.40) | 1.17 (1.12 to 1.21) |
| 20 to <21 yrs | 12.86 (12.62 to 13.10)            | 12.19 (11.92 to 12.46) | 14.78 (14.28 to 15.27) | 1.21 (1.16 to 1.26) |
| 21 to <22 yrs | 12.32 (12.08 to 12.57)            | 11.56 (11.28 to 11.84) | 14.43 (13.92 to 14.94) | 1.25 (1.20 to 1.30) |
| 22 to <23 yrs | 11.92 (11.66 to 12.18)            | 11.24 (10.94 to 11.53) | 13.75 (13.23 to 14.28) | 1.22 (1.17 to 1.28) |
| 23 to <24 yrs | 11.10 (10.83 to 11.37)            | 10.61 (10.30 to 10.91) | 12.40 (11.87 to 12.92) | 1.17 (1.11 to 1.23) |
| 24 to <25 yrs | 10.88 (10.59 to 11.16)            | 10.24 (9.92 to 10.56)  | 12.51 (11.94 to 13.08) | 1.22 (1.16 to 1.29) |
| 25 to <26 yrs | 10.07 (9.78 to 10.37)             | 9.47 (9.13 to 9.81)    | 11.58 (10.99 to 12.17) | 1.22 (1.15 to 1.30) |
| 26 to <27 yrs | 9.52 (9.20 to 9.84)               | 8.97 (8.60 to 9.34)    | 10.86 (10.24 to 11.48) | 1.21 (1.13 to 1.30) |
| 27 to <28 yrs | 9.30 (8.95 to 9.66)               | 8.72 (8.32 to 9.13)    | 10.69 (10.00 to 11.38) | 1.23 (1.13 to 1.32) |
| 28 to <29 yrs | 8.53 (8.14 to 8.92)               | 7.86 (7.42 to 8.30)    | 10.11 (9.34 to 10.87)  | 1.29 (1.17 to 1.41) |
| 29 to <30 yrs | 8.99 (8.50 to 9.48)               | 8.34 (7.79 to 8.89)    | 10.52 (9.58 to 11.45)  | 1.26 (1.13 to 1.41) |
| 30 to <31 yrs | 7.66 (7.08 to 8.24)               | 7.08 (6.43 to 7.74)    | 8.99 (7.88 to 10.10)   | 1.27 (1.09 to 1.47) |
| 31 to <32 yrs | 7.71 (6.75 to 8.67)               | 8.06 (6.87 to 9.24)    | 6.92 (5.28 to 8.57)    | 0.86 (0.65 to 1.14) |

All incidence rates are standardised by calendar year of birth year and presented stratified by attained age. Abbreviations: IR = incidence rate; IRR = incidence rate ratio; CI = confidence interval.

**Supplementary Table 5.** Standardised incidence rates of bone fractures in offspring before one year of age after excluding diagnoses recorded in the Medical Birth Register, overall and stratified by maternal smoking during pregnancy.

| Attained age | IR per 1000 person-years (95% CI) |                     |                     | IRR (95% CI)        |
|--------------|-----------------------------------|---------------------|---------------------|---------------------|
|              | All                               | No smoking          | Smoking             |                     |
| 0 to <1 yr   | 1.22 (1.17 to 1.27)               | 1.15 (1.09 to 1.21) | 1.47 (1.34 to 1.59) | 1.28 (1.15 to 1.41) |

All incidence rates are standardised by calendar year of birth year and presented for fractures before one year of age. Abbreviations: IR = incidence rate; IRR = incidence rate ratio; CI = confidence interval.

**Supplementary Table 6.** Standardised incidence rates of bone fractures in male and female offspring by attained age, overall and stratified by maternal smoking during pregnancy.

| Attained age  | IR per 1000 person-years (95% CI) – Males |                        |                        | IRR (95% CI)        |
|---------------|-------------------------------------------|------------------------|------------------------|---------------------|
|               | All                                       | No smoking             | Smoking                |                     |
| 0 to <1 yr    | 1.47 (1.39 to 1.55)                       | 1.39 (1.30 to 1.48)    | 1.75 (1.56 to 1.94)    | 1.26 (1.11 to 1.43) |
| 1 to <2 yrs   | 1.67 (1.59 to 1.76)                       | 1.69 (1.59 to 1.79)    | 1.59 (1.39 to 1.79)    | 0.94 (0.82 to 1.08) |
| 2 to <3 yrs   | 2.77 (2.66 to 2.88)                       | 2.77 (2.64 to 2.89)    | 2.80 (2.53 to 3.06)    | 1.01 (0.91 to 1.12) |
| 3 to <4 yrs   | 3.84 (3.71 to 3.97)                       | 3.84 (3.69 to 3.99)    | 3.85 (3.53 to 4.16)    | 1.00 (0.91 to 1.10) |
| 4 to <5 yrs   | 5.16 (5.00 to 5.31)                       | 5.22 (5.04 to 5.39)    | 4.88 (4.53 to 5.24)    | 0.94 (0.86 to 1.01) |
| 5 to <6 yrs   | 6.73 (6.55 to 6.91)                       | 6.70 (6.50 to 6.90)    | 6.87 (6.45 to 7.30)    | 1.03 (0.96 to 1.10) |
| 6 to <7 yrs   | 8.53 (8.32 to 8.73)                       | 8.47 (8.25 to 8.69)    | 8.76 (8.28 to 9.24)    | 1.03 (0.97 to 1.10) |
| 7 to <8 yrs   | 9.50 (9.29 to 9.72)                       | 9.37 (9.14 to 9.61)    | 10.09 (9.58 to 10.61)  | 1.08 (1.02 to 1.14) |
| 8 to <9 yrs   | 10.24 (10.02 to 10.46)                    | 10.16 (9.91 to 10.40)  | 10.61 (10.08 to 11.14) | 1.04 (0.99 to 1.10) |
| 9 to <10 yrs  | 12.38 (12.13 to 12.62)                    | 12.14 (11.87 to 12.41) | 13.38 (12.79 to 13.98) | 1.10 (1.05 to 1.16) |
| 10 to <11 yrs | 15.13 (14.86 to 15.40)                    | 14.83 (14.53 to 15.14) | 16.38 (15.72 to 17.03) | 1.10 (1.06 to 1.15) |
| 11 to <12 yrs | 20.08 (19.76 to 20.40)                    | 19.77 (19.42 to 20.13) | 21.33 (20.58 to 22.07) | 1.08 (1.04 to 1.12) |
| 12 to <13 yrs | 25.89 (25.52 to 26.25)                    | 25.24 (24.84 to 25.65) | 28.42 (27.56 to 29.28) | 1.13 (1.09 to 1.17) |
| 13 to <14 yrs | 30.56 (30.16 to 30.97)                    | 30.25 (29.79 to 30.70) | 31.77 (30.87 to 32.68) | 1.05 (1.02 to 1.09) |
| 14 to <15 yrs | 31.46 (31.04 to 31.89)                    | 31.45 (30.97 to 31.93) | 31.53 (30.61 to 32.44) | 1.00 (0.97 to 1.04) |
| 15 to <16 yrs | 29.90 (29.47 to 30.33)                    | 29.79 (29.31 to 30.28) | 30.27 (29.36 to 31.18) | 1.02 (0.98 to 1.05) |
| 16 to <17 yrs | 21.60 (21.22 to 21.98)                    | 21.36 (20.93 to 21.79) | 22.39 (21.60 to 23.19) | 1.05 (1.01 to 1.09) |
| 17 to <18 yrs | 19.38 (19.01 to 19.75)                    | 18.68 (18.26 to 19.09) | 21.59 (20.80 to 22.38) | 1.16 (1.11 to 1.21) |
| 18 to <19 yrs | 19.50 (19.12 to 19.89)                    | 18.57 (18.14 to 19.00) | 22.32 (21.50 to 23.14) | 1.20 (1.15 to 1.26) |
| 19 to <20 yrs | 18.98 (18.58 to 19.37)                    | 18.04 (17.59 to 18.49) | 21.71 (20.88 to 22.55) | 1.20 (1.15 to 1.26) |
| 20 to <21 yrs | 18.27 (17.87 to 18.68)                    | 17.26 (16.80 to 17.71) | 21.16 (20.31 to 22.02) | 1.23 (1.17 to 1.29) |
| 21 to <22 yrs | 17.36 (16.94 to 17.78)                    | 16.17 (15.70 to 16.64) | 20.67 (19.79 to 21.55) | 1.28 (1.21 to 1.35) |
| 22 to <23 yrs | 16.87 (16.42 to 17.31)                    | 15.80 (15.30 to 16.30) | 19.73 (18.83 to 20.64) | 1.25 (1.18 to 1.32) |
| 23 to <24 yrs | 15.65 (15.19 to 16.10)                    | 14.83 (14.32 to 15.35) | 17.79 (16.88 to 18.71) | 1.20 (1.13 to 1.28) |
| 24 to <25 yrs | 15.00 (14.51 to 15.48)                    | 14.00 (13.45 to 14.55) | 17.60 (16.61 to 18.58) | 1.26 (1.18 to 1.34) |
| 25 to <26 yrs | 13.63 (13.13 to 14.14)                    | 12.66 (12.09 to 13.22) | 16.12 (15.11 to 17.13) | 1.27 (1.18 to 1.37) |
| 26 to <27 yrs | 13.02 (12.48 to 13.56)                    | 11.93 (11.32 to 12.54) | 15.73 (14.64 to 16.83) | 1.32 (1.21 to 1.44) |
| 27 to <28 yrs | 12.46 (11.87 to 13.06)                    | 11.73 (11.05 to 12.40) | 14.27 (13.11 to 15.42) | 1.22 (1.10 to 1.34) |
| 28 to <29 yrs | 11.30 (10.65 to 11.95)                    | 10.40 (9.67 to 11.13)  | 13.44 (12.17 to 14.72) | 1.29 (1.15 to 1.45) |
| 29 to <30 yrs | 11.44 (10.65 to 12.23)                    | 10.39 (9.51 to 11.27)  | 13.95 (12.39 to 15.50) | 1.34 (1.17 to 1.54) |
| 30 to <31 yrs | 9.95 (9.00 to 10.90)                      | 9.55 (8.46 to 10.64)   | 10.90 (9.15 to 12.65)  | 1.14 (0.94 to 1.38) |
| 31 to <32 yrs | 9.72 (8.17 to 11.27)                      | 10.48 (8.55 to 12.42)  | 7.99 (5.45 to 10.53)   | 0.76 (0.53 to 1.10) |

**Supplementary Table 6. Continued**

| <b>Attained age</b> | <b>IR per 1000 person-years (95% CI) – Females</b> |                        |                        | <b>IRR (95% CI)</b> |
|---------------------|----------------------------------------------------|------------------------|------------------------|---------------------|
|                     | <b>All</b>                                         | <b>No smoking</b>      | <b>Smoking</b>         |                     |
| 0 to <1 yr          | 1.22 (1.14 to 1.29)                                | 1.16 (1.08 to 1.25)    | 1.42 (1.24 to 1.59)    | 1.22 (1.05 to 1.41) |
| 1 to <2 yrs         | 1.28 (1.20 to 1.36)                                | 1.30 (1.21 to 1.38)    | 1.20 (1.03 to 1.38)    | 0.93 (0.79 to 1.09) |
| 2 to <3 yrs         | 1.97 (1.87 to 2.07)                                | 1.98 (1.88 to 2.09)    | 1.91 (1.68 to 2.14)    | 0.96 (0.84 to 1.10) |
| 3 to <4 yrs         | 2.67 (2.55 to 2.78)                                | 2.64 (2.52 to 2.77)    | 2.78 (2.50 to 3.06)    | 1.05 (0.94 to 1.18) |
| 4 to <5 yrs         | 3.82 (3.68 to 3.95)                                | 3.81 (3.66 to 3.96)    | 3.86 (3.53 to 4.19)    | 1.01 (0.92 to 1.11) |
| 5 to <6 yrs         | 5.12 (4.96 to 5.27)                                | 5.11 (4.94 to 5.28)    | 5.14 (4.76 to 5.53)    | 1.01 (0.93 to 1.09) |
| 6 to <7 yrs         | 6.43 (6.25 to 6.61)                                | 6.35 (6.15 to 6.54)    | 6.81 (6.37 to 7.25)    | 1.07 (1.00 to 1.15) |
| 7 to <8 yrs         | 7.53 (7.33 to 7.72)                                | 7.52 (7.31 to 7.74)    | 7.56 (7.10 to 8.02)    | 1.00 (0.94 to 1.08) |
| 8 to <9 yrs         | 8.79 (8.58 to 9.00)                                | 8.65 (8.42 to 8.88)    | 9.46 (8.94 to 9.98)    | 1.09 (1.03 to 1.16) |
| 9 to <10 yrs        | 11.40 (11.16 to 11.64)                             | 11.32 (11.06 to 11.59) | 11.76 (11.19 to 12.33) | 1.04 (0.98 to 1.10) |
| 10 to <11 yrs       | 14.90 (14.62 to 15.17)                             | 14.54 (14.24 to 14.85) | 16.43 (15.76 to 17.11) | 1.13 (1.08 to 1.18) |
| 11 to <12 yrs       | 17.63 (17.32 to 17.93)                             | 17.48 (17.14 to 17.82) | 18.24 (17.53 to 18.95) | 1.04 (1.00 to 1.09) |
| 12 to <13 yrs       | 16.75 (16.45 to 17.05)                             | 16.58 (16.25 to 16.92) | 17.43 (16.74 to 18.11) | 1.05 (1.01 to 1.10) |
| 13 to <14 yrs       | 13.33 (13.06 to 13.60)                             | 13.19 (12.89 to 13.49) | 13.88 (13.28 to 14.49) | 1.05 (1.00 to 1.11) |
| 14 to <15 yrs       | 11.21 (10.96 to 11.47)                             | 11.16 (10.88 to 11.45) | 11.39 (10.84 to 11.94) | 1.02 (0.97 to 1.08) |
| 15 to <16 yrs       | 10.59 (10.34 to 10.85)                             | 10.40 (10.12 to 10.69) | 11.26 (10.70 to 11.81) | 1.08 (1.02 to 1.14) |
| 16 to <17 yrs       | 9.06 (8.82 to 9.30)                                | 8.95 (8.67 to 9.22)    | 9.43 (8.92 to 9.94)    | 1.05 (0.99 to 1.12) |
| 17 to <18 yrs       | 8.65 (8.41 to 8.89)                                | 8.36 (8.09 to 8.64)    | 9.55 (9.04 to 10.07)   | 1.14 (1.07 to 1.22) |
| 18 to <19 yrs       | 8.23 (7.99 to 8.48)                                | 7.90 (7.63 to 8.18)    | 9.25 (8.74 to 9.77)    | 1.17 (1.10 to 1.25) |
| 19 to <20 yrs       | 8.01 (7.76 to 8.26)                                | 7.83 (7.55 to 8.12)    | 8.54 (8.03 to 9.05)    | 1.09 (1.02 to 1.17) |
| 20 to <21 yrs       | 7.79 (7.53 to 8.05)                                | 7.43 (7.14 to 7.72)    | 8.84 (8.30 to 9.38)    | 1.19 (1.11 to 1.28) |
| 21 to <22 yrs       | 7.62 (7.35 to 7.89)                                | 7.24 (6.93 to 7.55)    | 8.67 (8.12 to 9.22)    | 1.20 (1.11 to 1.29) |
| 22 to <23 yrs       | 7.33 (7.05 to 7.61)                                | 6.97 (6.65 to 7.29)    | 8.28 (7.71 to 8.85)    | 1.19 (1.09 to 1.29) |
| 23 to <24 yrs       | 6.90 (6.61 to 7.19)                                | 6.67 (6.34 to 7.01)    | 7.49 (6.92 to 8.06)    | 1.12 (1.03 to 1.23) |
| 24 to <25 yrs       | 7.08 (6.76 to 7.40)                                | 6.75 (6.39 to 7.12)    | 7.92 (7.29 to 8.54)    | 1.17 (1.07 to 1.29) |
| 25 to <26 yrs       | 6.80 (6.46 to 7.14)                                | 6.52 (6.13 to 6.91)    | 7.49 (6.84 to 8.15)    | 1.15 (1.03 to 1.28) |
| 26 to <27 yrs       | 6.30 (5.93 to 6.66)                                | 6.22 (5.80 to 6.65)    | 6.47 (5.81 to 7.14)    | 1.04 (0.92 to 1.17) |
| 27 to <28 yrs       | 6.39 (5.98 to 6.80)                                | 5.93 (5.46 to 6.40)    | 7.48 (6.68 to 8.28)    | 1.26 (1.11 to 1.44) |
| 28 to <29 yrs       | 5.96 (5.51 to 6.42)                                | 5.48 (4.96 to 5.99)    | 7.08 (6.20 to 7.96)    | 1.29 (1.11 to 1.51) |
| 29 to <30 yrs       | 6.72 (6.12 to 7.31)                                | 6.42 (5.74 to 7.11)    | 7.39 (6.30 to 8.49)    | 1.15 (0.96 to 1.38) |
| 30 to <31 yrs       | 5.52 (4.83 to 6.21)                                | 4.76 (4.01 to 5.52)    | 7.24 (5.86 to 8.63)    | 1.52 (1.19 to 1.94) |
| 31 to <32 yrs       | 5.82 (4.65 to 6.98)                                | 5.77 (4.37 to 7.16)    | 5.92 (3.80 to 8.04)    | 1.03 (0.67 to 1.58) |

All incidence rates are standardised by calendar year of birth year and presented stratified by attained age in female and male offspring separately. Abbreviations: IR = incidence rate; IRR = incidence rate ratio; CI = confidence interval.

**Supplementary Table 7.** Maternal smoking during pregnancy and risk of bone fractures in offspring by attained age.

|                           | <b>Model 1</b>          |                     | <b>Model 2</b>           |                     | <b>Model 3</b>             |                     |
|---------------------------|-------------------------|---------------------|--------------------------|---------------------|----------------------------|---------------------|
| <b>Attained age</b>       | <b>N all /fractures</b> | <b>HR (95% CI)</b>  | <b>N all / fractures</b> | <b>HR (95% CI)</b>  | <b>N all / fractures *</b> | <b>HR (95% CI)</b>  |
| <b>0 to &lt; 1 year</b>   |                         |                     |                          |                     |                            |                     |
| Smoking                   |                         |                     |                          |                     |                            |                     |
| No                        | 1302940 / 1669          | REF (1.00)          | 873913 / 1072            | REF (1.00)          | 113 / 38                   | REF (1.00)          |
| Yes                       | 377367 / 584            | 1.24 (1.13 to 1.36) | 236868 / 374             | 1.27 (1.12 to 1.45) | 111 / 56                   | 1.58 (1.01 to 2.46) |
| No. of cigarettes/day     |                         |                     |                          |                     |                            |                     |
| None                      | 1302940 / 1669          | REF (1.00)          | 873913 / 1072            | REF (1.00)          | 113 / 38                   | REF (1.00)          |
| 1-9 cigarettes/day        | 236094 / 348            | 1.18 (1.05 to 1.32) | 149855 / 221             | 1.20 (1.03 to 1.39) | 74 / 38                    | 1.55 (0.98 to 2.46) |
| ≥ 10 cigarettes/day       | 141273 / 236            | 1.35 (1.17 to 1.54) | 87013 / 153              | 1.41 (1.18 to 1.69) | 37 / 18                    | 1.63 (0.94 to 2.85) |
| <i>P</i> trend            |                         | < 0.001             |                          | < 0.001             |                            | 0.08                |
| <b>1 to &lt; 5 years</b>  |                         |                     |                          |                     |                            |                     |
| Smoking                   |                         |                     |                          |                     |                            |                     |
| No                        | 1292632 / 15683         | REF (1.00)          | 869657 / 12007           | REF (1.00)          | 907 / 449                  | REF (1.00)          |
| Yes                       | 373599 / 3395           | 0.98 (0.95 to 1.02) | 235430 / 2365            | 0.96 (0.92 to 1.01) | 913 / 311                  | 0.94 (0.80 to 1.12) |
| No. of cigarettes/day     |                         |                     |                          |                     |                            |                     |
| None                      | 1292632 / 15683         | REF (1.00)          | 869657 / 12007           | REF (1.00)          | 907 / 449                  | REF (1.00)          |
| 1-9 cigarettes/day        | 233897 / 2150           | 0.97 (0.93 to 1.02) | 149032 / 1502            | 0.94 (0.89 to 1.00) | 696 / 236                  | 0.89 (0.75 to 1.06) |
| ≥ 10 cigarettes/day       | 139702 / 1245           | 1.01 (0.95 to 1.07) | 86398 / 863              | 0.99 (0.92 to 1.07) | 217 / 75                   | 1.16 (0.92 to 1.46) |
| <i>P</i> trend            |                         | 0.65                |                          | 0.27                |                            | 0.38                |
| <b>5 to &lt; 15 years</b> |                         |                     |                          |                     |                            |                     |
| Smoking                   |                         |                     |                          |                     |                            |                     |
| No                        | 1258379 / 167585        | REF (1.00)          | 850229 / 118356          | REF (1.00)          | 8111 / 3901                | REF (1.00)          |
| Yes                       | 365874 / 43476          | 1.06 (1.05 to 1.07) | 231779 / 27724           | 1.07 (1.05 to 1.08) | 8028 / 3263                | 1.01 (0.96 to 1.07) |
| No. of cigarettes/day     |                         |                     |                          |                     |                            |                     |
| None                      | 1258379 / 167585        | REF (1.00)          | 850229 / 118356          | REF (1.00)          | 8111 / 3901                | REF (1.00)          |
| 1-9 cigarettes/day        | 229015 / 27554          | 1.06 (1.05 to 1.07) | 146706 / 17759           | 1.06 (1.05 to 1.08) | 6145 / 2519                | 1.01 (0.96 to 1.07) |
| ≥ 10 cigarettes/day       | 136859 / 15922          | 1.06 (1.05 to 1.08) | 85073 / 9965             | 1.08 (1.06 to 1.10) | 1883 / 744                 | 1.02 (0.95 to 1.09) |
| <i>P</i> trend            |                         | < 0.001             |                          | < 0.001             |                            | 0.63                |
| <b>≥ 15 years</b>         |                         |                     |                          |                     |                            |                     |
| Smoking                   |                         |                     |                          |                     |                            |                     |
| No                        | 1015792 / 104435        | REF (1.00)          | 675564 / 66001           | REF (1.00)          | 5030 / 2119                | REF (1.00)          |
| Yes                       | 310479 / 41143          | 1.15 (1.14 to 1.17) | 195867 / 25423           | 1.11 (1.09 to 1.12) | 4996 / 2337                | 0.96 (0.89 to 1.03) |
| No. of cigarettes/day     |                         |                     |                          |                     |                            |                     |
| No                        | 1015792 / 104435        | REF (1.00)          | 675564 / 66001           | REF (1.00)          | 5030 / 2119                | REF (1.00)          |
| 1-9 cigarettes/day        | 193498 / 25122          | 1.14 (1.12 to 1.15) | 123344 / 15751           | 1.10 (1.08 to 1.12) | 3758 / 1789                | 0.95 (0.88 to 1.02) |
| ≥ 10 cigarettes/day       | 116981 / 16021          | 1.18 (1.16 to 1.20) | 72523 / 9672             | 1.12 (1.09 to 1.14) | 1238 / 548                 | 0.97 (0.89 to 1.07) |
| <i>P</i> trend            |                         | < 0.001             |                          | < 0.001             |                            | 0.51                |



Hazard ratios (with 95% confidence intervals) for bone fractures comparing offspring exposed to maternal smoking during pregnancy (any, 1-9 cigarettes/day,  $\geq 10$  cigarettes day) to those unexposed (= reference group). Hazard ratios are presented by attained age (0 to < 1 year, 1 to < 5 years, 5 to < 15 years,  $\geq 15$  years) and for the different analysis models: model 1: whole cohort analysis adjusted for birth year; model 2: whole cohort analysis with adjustment for birth year, offspring sex, maternal age, parity, height, body mass index, parental education, occupation and marital status; and model 3: within-sibship analysis including all covariates included in model 2 except for maternal height, a variable which is unlikely to vary among siblings in the same family. \* The within-sibship analysis model includes all offspring with siblings, but only families who are discordant on both the exposure and outcome contribute to the estimation of the hazard ratio. The numbers presented in the table therefore refer to the total number of offspring with siblings discordant on bone fractures and maternal smoking during pregnancy. Abbreviations: HR = hazard ratio; CI = confidence interval.

**Supplementary Table 8.** Maternal smoking during pregnancy and risk of bone fractures in offspring by attained age in months up to one year of age.

|                                | Model 1           |                     | Model 2           |                     | Model 3             |                     |
|--------------------------------|-------------------|---------------------|-------------------|---------------------|---------------------|---------------------|
| Attained age                   | N all / fractures | HR (95% CI)         | N all / fractures | HR (95% CI)         | N all / fractures * | HR (95% CI)         |
| <b>0 to &lt; 3 months</b>      |                   |                     |                   |                     |                     |                     |
| Smoking                        |                   |                     |                   |                     |                     |                     |
| No                             | 1302940 / 514     | REF (1.00)          | 873913 / 330      | REF (1.00)          | 38 / 12             | REF (1.00)          |
| Yes                            | 377367 / 181      | 1.25 (1.05 to 1.48) | 236868 / 111      | 1.25 (0.99 to 1.58) | 47 / 21             | 2.83 (1.18 to 6.76) |
| No. of cigarettes/day          |                   |                     |                   |                     |                     |                     |
| None                           | 1302940 / 514     | REF (1.00)          | 873913 / 330      | REF (1.00)          | 38 / 12             | REF (1.00)          |
| 1-9 cigarettes/day             | 236094 / 104      | 1.15 (0.93 to 1.42) | 149855 / 60       | 1.08 (0.81 to 1.44) | 24 / 11             | 2.39 (0.92 to 6.25) |
| ≥ 10 cigarettes/day            | 141273 / 77       | 1.43 (1.12 to 1.82) | 87013 / 51        | 1.56 (1.14 to 2.13) | 23 / 10             | 3.36 (1.27 to 8.91) |
| <i>P</i> trend                 |                   | 0.003               |                   | 0.01                |                     | 0.02                |
| <b>3 months to &lt; 1 year</b> |                   |                     |                   |                     |                     |                     |
| Smoking                        |                   |                     |                   |                     |                     |                     |
| No                             | 1297665 / 1155    | REF (1.00)          | 871507 / 742      | REF (1.00)          | 74 / 26             | REF (1.00)          |
| Yes                            | 375332 / 403      | 1.24 (1.10 to 1.39) | 236093 / 263      | 1.28 (1.10 to 1.49) | 64 / 34             | 1.35 (0.78 to 2.36) |
| No. of cigarettes/day          |                   |                     |                   |                     |                     |                     |
| None                           | 1297665 / 1155    | REF (1.00)          | 871507 / 742      | REF (1.00)          | 74 / 26             | REF (1.00)          |
| 1-9 cigarettes/day             | 234903 / 244      | 1.19 (1.04 to 1.37) | 149406 / 161      | 1.25 (1.04 to 1.49) | 50 / 27             | 1.41 (0.80 to 2.48) |
| ≥ 10 cigarettes/day            | 140429 / 159      | 1.31 (1.11 to 1.55) | 86687 / 102       | 1.35 (1.09 to 1.68) | 14 / 7              | 1.13 (0.54 to 2.36) |
| <i>P</i> trend                 |                   | <0.001              |                   | 0.001               |                     | 0.70                |

Hazard ratios (with 95% confidence intervals) for infant bone fractures comparing offspring exposed to maternal smoking during pregnancy (any, 1-9 cigarettes/day, ≥ 10 cigarettes day) to those unexposed (= reference group). Hazard ratios are presented by attained age (0 to < 3 months, 3 months to < 1 year) and for the different analysis models: model 1: whole cohort analysis adjusted for birth year; model 2: whole cohort analysis adjusted for birth year, offspring sex, maternal age, parity, height, body mass index, parental education, occupation and marital status; and model 3: within-sibship analysis including all covariates included in model 2 except for maternal height, a variable which is unlikely to vary among siblings in the same family. \* The within-sibship analysis model includes all offspring with siblings, but only families who are discordant on both the exposure and outcome contribute to the estimation of the hazard ratio. The numbers presented in the table therefore refer to the total number of offspring with siblings discordant on bone fractures and maternal smoking during pregnancy. Abbreviations: HR = hazard ratio; CI = confidence interval.

**Supplementary Table 9.** Maternal smoking during pregnancy and risk of bone fractures in offspring by attained age – analyses with additional adjustment for gestational age at birth and birth weight for gestational age.

|                           | <b>Model 4</b>           |                     | <b>Model 5</b>           |                     |
|---------------------------|--------------------------|---------------------|--------------------------|---------------------|
| <b>Attained age</b>       | <b>N all / fractures</b> | <b>HR (95% CI)</b>  | <b>N all / fractures</b> | <b>HR (95% CI)</b>  |
| <b>0 to &lt; 1 year</b>   |                          |                     |                          |                     |
| Smoking                   |                          |                     |                          |                     |
| No                        | 870621 / 1069            | REF (1.00)          | 113 / 38                 | REF (1.00)          |
| Yes                       | 235857 / 371             | 1.27 (1.11 to 1.44) | 111 / 56                 | 1.58 (1.01 to 2.48) |
| No. of cigarettes/day     |                          |                     |                          |                     |
| No                        | 870621 / 1069            | REF (1.00)          | 113 / 38                 | REF (1.00)          |
| 1-9 cigarettes/day        | 149206 / 220             | 1.19 (1.03 to 1.39) | 74 / 38                  | 1.56 (0.98 to 2.48) |
| ≥ 10 cigarettes/day       | 86651 / 151              | 1.40 (1.16 to 1.67) | 37 / 18                  | 1.65 (0.94 to 2.90) |
| <i>P</i> trend            |                          | < 0.001             |                          | 0.08                |
| <b>1 to &lt; 5 years</b>  |                          |                     |                          |                     |
| Smoking                   |                          |                     |                          |                     |
| No                        | 866540 / 11952           | REF (1.00)          | 901 / 447                | REF (1.00)          |
| Yes                       | 234467 / 2353            | 0.96 (0.92 to 1.01) | 904 / 308                | 0.94 (0.79 to 1.11) |
| No. of cigarettes/day     |                          |                     |                          |                     |
| None                      | 866540 / 11952           | REF (1.00)          | 901 / 447                | REF (1.00)          |
| 1-9 cigarettes/day        | 148409 / 1493            | 0.94 (0.89 to 1.00) | 689 / 234                | 0.89 (0.74 to 1.05) |
| ≥ 10 cigarettes/day       | 86058 / 860              | 0.99 (0.93 to 1.07) | 215 / 74                 | 1.14 (0.91 to 1.43) |
| <i>P</i> trend            |                          | 0.28                |                          | 0.47                |
| <b>5 to &lt; 15 years</b> |                          |                     |                          |                     |
| Smoking                   |                          |                     |                          |                     |
| No                        | 847203 / 117989          | REF (1.00)          | 8047 / 3872              | REF (1.00)          |
| Yes                       | 230831 / 27628           | 1.07 (1.06 to 1.09) | 7969 / 3239              | 1.01 (0.96 to 1.07) |
| No. of cigarettes/day     |                          |                     |                          |                     |
| None                      | 847203 / 117989          | REF (1.00)          | 8047 / 3872              | REF (1.00)          |
| 1-9 cigarettes/day        | 146092 / 17695           | 1.07 (1.05 to 1.08) | 6098 / 2499              | 1.01 (0.96 to 1.07) |
| ≥ 10 cigarettes/day       | 84739 / 9933             | 1.08 (1.06 to 1.11) | 1871 / 740               | 1.02 (0.95 to 1.09) |
| <i>P</i> trend            |                          | < 0.001             |                          | 0.58                |
| <b>≥ 15 years</b>         |                          |                     |                          |                     |
| Smoking                   |                          |                     |                          |                     |
| No                        | 673085 / 65762           | REF (1.00)          | 5001 / 2105              | REF (1.00)          |
| Yes                       | 195038 / 25309           | 1.11 (1.10 to 1.13) | 4959 / 2322              | 0.96 (0.89 to 1.03) |
| No. of cigarettes/day     |                          |                     |                          |                     |
| None                      | 673085 / 65762           | REF (1.00)          | 5001 / 2105              | REF (1.00)          |
| 1-9 cigarettes/day        | 122807 / 15682           | 1.11 (1.09 to 1.13) | 3734 / 1782              | 0.95 (0.89 to 1.03) |
| ≥ 10 cigarettes/day       | 72231 / 9627             | 1.13 (1.10 to 1.15) | 1225 / 540               | 0.98 (0.89 to 1.08) |
| <i>P</i> trend            |                          | < 0.001             |                          | 0.63                |

Hazard ratios (with 95% confidence intervals) for bone fractures comparing offspring exposed to maternal smoking during pregnancy (any, 1-9 cigarettes/day, ≥ 10 cigarettes/day) to those unexposed (= reference group) – analyses with additional adjustment for gestational age at birth and birth weight for gestational age. Hazard ratios are presented by attained age (0 to < 1 year, 1 to < 5 years, 5 to < 15 years, ≥ 15 years) and for the different analysis models: model 4: whole cohort analysis with adjustment for birth year, offspring sex, maternal age, parity, height, body mass index, parental education, occupation, marital status, gestational age at birth and birth weight for gestational age; and model 5: within-sibship analysis including all covariates included in model 4 except for maternal height, a variable which is unlikely to vary among siblings in the same family. \* The within-sibship analysis model includes all offspring with siblings, but only families who are discordant on both the exposure and outcome contribute to the estimation of the hazard ratio. The numbers presented in the table therefore refer to the total number of offspring with siblings discordant on bone fractures and maternal smoking during pregnancy. Abbreviations: HR = hazard ratio; CI = confidence interval.

**Supplementary Table 10.** Maternal smoking during pregnancy and risk of bone fractures in offspring by attained age – whole cohort analyses stratified by offspring sex.

|                           | Model 2 - males   |                     | Model 2 - females |                     |               |
|---------------------------|-------------------|---------------------|-------------------|---------------------|---------------|
| Attained age              | N all / fractures | HR (95% CI)         | N all / fractures | HR (95% CI)         | P interaction |
| <b>0 to &lt; 1 year</b>   |                   |                     |                   |                     |               |
| Smoking                   |                   |                     |                   |                     |               |
| No                        | 448853 / 588      | REF (1.00)          | 425060 / 484      | REF (1.00)          | 0.97          |
| Yes                       | 122065 / 206      | 1.29 (1.08 to 1.53) | 114803 / 168      | 1.26 (1.04 to 1.52) |               |
| No. of cigarettes/day     |                   |                     |                   |                     |               |
| None                      | 448853 / 588      | REF (1.00)          | 425060 / 484      | REF (1.00)          | 0.98          |
| 1-9 cigarettes/day        | 77350 / 120       | 1.19 (0.97 to 1.46) | 72505 / 101       | 1.21 (0.96 to 1.51) |               |
| ≥ 10 cigarettes/day       | 44715 / 86        | 1.46 (1.15 to 1.86) | 42298 / 67        | 1.36 (1.04 to 1.77) |               |
| <i>P</i> trend            |                   | 0.001               |                   | 0.01                |               |
| <b>1 to &lt; 5 years</b>  |                   |                     |                   |                     |               |
| Smoking                   |                   |                     |                   |                     |               |
| No                        | 446527 / 7077     | REF (1.00)          | 423130 / 4930     | REF (1.00)          | 0.87          |
| Yes                       | 121255 / 1397     | 0.93 (0.87 to 0.99) | 114175 / 968      | 1.01 (0.93 to 1.08) |               |
| No. of cigarettes/day     |                   |                     |                   |                     |               |
| None                      | 446527 / 7077     | REF (1.00)          | 423130 / 4930     | REF (1.00)          | 0.25          |
| 1-9 cigarettes/day        | 76879 / 891       | 0.92 (0.86 to 0.99) | 72153 / 611       | 0.98 (0.90 to 1.07) |               |
| ≥ 10 cigarettes/day       | 44376 / 506       | 0.95 (0.87 to 1.04) | 42022 / 357       | 1.06 (0.95 to 1.18) |               |
| <i>P</i> trend            |                   | 0.06                |                   | 0.55                |               |
| <b>5 to &lt; 15 years</b> |                   |                     |                   |                     |               |
| Smoking                   |                   |                     |                   |                     |               |
| No                        | 435637 / 70609    | REF (1.00)          | 414592 / 47747    | REF (1.00)          | < 0.001       |
| Yes                       | 119191 / 16912    | 1.07 (1.05 to 1.09) | 112588 / 10812    | 1.07 (1.05 to 1.09) |               |
| No. of cigarettes/day     |                   |                     |                   |                     |               |
| No                        | 435637 / 70609    | REF (1.00)          | 414592 / 47747    | REF (1.00)          | 0.43          |
| 1-9 cigarettes/day        | 75571 / 10834     | 1.06 (1.04 to 1.09) | 71135 / 6925      | 1.06 (1.04 to 1.09) |               |
| ≥ 10 cigarettes/day       | 43620 / 6078      | 1.08 (1.05 to 1.11) | 41453 / 3887      | 1.08 (1.04 to 1.12) |               |
| <i>P</i> trend            |                   | < 0.001             |                   | < 0.001             |               |
| <b>≥ 15 years</b>         |                   |                     |                   |                     |               |
| Smoking                   |                   |                     |                   |                     |               |
| No                        | 337045 / 45438    | REF (1.00)          | 338519 / 20563    | REF (1.00)          | 0.02          |
| Yes                       | 98048 / 17634     | 1.10 (1.08 to 1.12) | 97819 / 7789      | 1.12 (1.09 to 1.15) |               |
| No. of cigarettes/day     |                   |                     |                   |                     |               |
| No                        | 337045 / 45438    | REF (1.00)          | 338519 / 20563    | REF (1.00)          | 0.19          |
| 1-9 cigarettes/day        | 61845 / 10977     | 1.10 (1.08 to 1.12) | 61499 / 4774      | 1.10 (1.06 to 1.13) |               |
| ≥ 10 cigarettes/day       | 36203 / 6657      | 1.10 (1.07 to 1.13) | 36320 / 3015      | 1.15 (1.10 to 1.20) |               |
| <i>P</i> trend            |                   | < 0.001             |                   | < 0.001             |               |

Hazard ratios (with 95% confidence intervals) for bone fractures comparing offspring exposed to maternal smoking during pregnancy (any, 1-9 cigarettes/day,  $\geq 10$  cigarettes day) to those unexposed (= reference group) – analyses stratified by offspring sex. Hazard ratios are presented by attained age (0 to < 1 year, 1 to < 5 years, 5 to < 15 years,  $\geq 15$  years) for model 2: whole cohort analysis adjusted for birth year, offspring sex, maternal age, parity, height, body mass index, parental education, occupation and marital status. Abbreviations: HR = hazard ratio; CI = confidence interval.

**Supplementary Table 11.** Maternal smoking during pregnancy and risk of bone fractures in offspring by attained age – within-sibship analyses stratified by offspring sex.

|                           | Model 3 - males     |                     | Model 3 - females   |                     |               |
|---------------------------|---------------------|---------------------|---------------------|---------------------|---------------|
| Attained age              | N all / fractures * | HR (95% CI)         | N all / fractures * | HR (95% CI)         | P interaction |
| <b>0 to &lt; 1 year</b>   |                     |                     |                     |                     |               |
| Smoking                   |                     |                     |                     |                     |               |
| No                        | 38 / 13             | REF (1.00)          | 18 / 6              | REF (1.00)          | 0.22          |
| Yes                       | 38 / 19             | 1.48 (0.65 to 3.35) | 15 / 7              | 0.99 (0.26 to 3.76) |               |
| No. of cigarettes/day     |                     |                     |                     |                     |               |
| None                      | 38 / 13             | REF (1.00)          | 18 / 6              | REF (1.00)          | 0.29          |
| 1-9 cigarettes/day        | 24 / 11             | 1.33 (0.56 to 3.14) | 11 / 5              | 0.92 (0.24 to 3.54) |               |
| ≥ 10 cigarettes/day       | 14 / 8              | 1.96 (0.67 to 5.79) | 4 / 2               | 2.12 (0.35;12.67)   |               |
| <i>P</i> trend            |                     | 0.22                |                     | 0.38                |               |
| <b>1 to &lt; 5 years</b>  |                     |                     |                     |                     |               |
| Smoking                   |                     |                     |                     |                     |               |
| No                        | 273 / 146           | REF (1.00)          | 168 / 90            | REF (1.00)          | 0.77          |
| Yes                       | 270 / 97            | 0.87 (0.65 to 1.17) | 158 / 57            | 0.89 (0.61 to 1.31) |               |
| No. of cigarettes/day     |                     |                     |                     |                     |               |
| None                      | 273 / 146           | REF (1.00)          | 168 / 90            | REF (1.00)          | 0.91          |
| 1-9 cigarettes/day        | 199 / 74            | 0.85 (0.63 to 1.15) | 127 / 45            | 0.83 (0.56 to 1.23) |               |
| ≥ 10 cigarettes/day       | 71 / 23             | 0.95 (0.65 to 1.39) | 31 / 12             | 1.22 (0.71 to 2.12) |               |
| <i>P</i> trend            |                     | 0.74                |                     | 0.69                |               |
| <b>5 to &lt; 15 years</b> |                     |                     |                     |                     |               |
| Smoking                   |                     |                     |                     |                     |               |
| No                        | 2381 / 1209         | REF (1.00)          | 1503 / 773          | REF (1.00)          | 0.56          |
| Yes                       | 2356 / 1014         | 1.02 (0.93 to 1.12) | 1519 / 635          | 1.03 (0.92 to 1.16) |               |
| No. of cigarettes/day     |                     |                     |                     |                     |               |
| No                        | 2381 / 1209         | REF (1.00)          | 1503 / 773          | REF (1.00)          | 0.39          |
| 1-9 cigarettes/day        | 1823 / 793          | 0.99 (0.90 to 1.09) | 1155 / 485          | 1.04 (0.93 to 1.18) |               |
| ≥ 10 cigarettes/day       | 533 / 221           | 1.14 (1.01 to 1.29) | 364 / 150           | 0.99 (0.85 to 1.16) |               |
| <i>P</i> trend            |                     | 0.07                |                     | 0.97                |               |
| <b>≥ 15 years</b>         |                     |                     |                     |                     |               |
| Smoking                   |                     |                     |                     |                     |               |
| No                        | 1634 / 736          | REF (1.00)          | 763 / 333           | REF (1.00)          | 0.28          |
| Yes                       | 1620 / 797          | 0.94 (0.84 to 1.05) | 773 / 374           | 0.91 (0.77 to 1.09) |               |
| No. of cigarettes/day     |                     |                     |                     |                     |               |
| No                        | 1634 / 736          | REF (1.00)          | 763 / 333           | REF (1.00)          | 0.33          |
| 1-9 cigarettes/day        | 1251 / 625          | 0.93 (0.82 to 1.04) | 586 / 288           | 0.91 (0.76 to 1.08) |               |
| ≥ 10 cigarettes/day       | 369 / 172           | 0.98 (0.84 to 1.14) | 187 / 86            | 0.94 (0.75 to 1.18) |               |
| <i>P</i> trend            |                     | 0.73                |                     | 0.56                |               |

Hazard ratios (with 95% confidence intervals) for bone fractures comparing offspring exposed to maternal smoking during pregnancy (any, 1-9 cigarettes/day,  $\geq 10$  cigarettes day) to those unexposed (= reference group) – analyses stratified by offspring sex. Hazard ratios are presented by attained age (0 to < 1 year, 1 to < 5 years, 5 to < 15 years,  $\geq 15$  years) for model 3: within-sibship analysis adjusted for birth year, offspring sex, maternal age, parity, body mass index, parental education, occupation and marital status. \* The within-sibship analysis model includes all offspring with siblings, but only families who are discordant on both the exposure and outcome contribute to the estimation of the hazard ratio. The numbers presented in the table therefore refer to the total number of offspring with siblings discordant on bone fractures and maternal smoking during pregnancy. Abbreviations: HR = hazard ratio; CI = confidence interval.

**Supplementary Table 12.** Maternal smoking during pregnancy and risk of recurrent bone fractures in offspring.

|                       | IRR (95% CI)        |                     |                     |
|-----------------------|---------------------|---------------------|---------------------|
|                       | Model 1             | Model 2             | Model 3             |
| Smoking               |                     |                     |                     |
| No                    | REF (1.00)          | REF (1.00)          | REF (1.00)          |
| Yes                   | 1.12 (1.11 to 1.13) | 1.10 (1.09 to 1.11) | 0.98 (0.96 to 1.01) |
| No. of cigarettes/day |                     |                     |                     |
| None                  | 1.11 (1.10 to 1.12) | REF (1.00)          | REF (1.00)          |
| 1-9 cigarettes/day    | 1.14 (1.12 to 1.15) | 1.09 (1.08 to 1.10) | 0.98 (0.95 to 1.01) |
| ≥ 10 cigarettes/day   | 1.11 (1.10 to 1.12) | 1.11 (1.09 to 1.13) | 0.98 (0.94 to 1.02) |
| <i>P</i> trend        | < 0.001             | < 0.001             | 0.27                |

Incidence rate ratios (with 95% confidence intervals) for recurrent bone fractures comparing offspring exposed to maternal smoking during pregnancy (any, 1-9 cigarettes/day, ≥ 10 cigarettes day) to those unexposed (= reference group). Hazard ratios are presented for the different analysis models: model 1: whole cohort analysis adjusted for birth year; model 2: whole cohort analysis adjusted for birth year, offspring sex, maternal age, parity, height, body mass index, parental education, occupation and marital status; and model 3: within-sibship analysis including all covariates included in model 2 except for maternal height, a variable which is unlikely to vary among siblings in the same family. Abbreviations: IRR = incidence rate ratio; CI = confidence interval.



**Supplementary Table 13.** Parental and infant characteristics in offspring with and without siblings in the study population.

| Parental characteristics                      | Offspring with siblings |                      |
|-----------------------------------------------|-------------------------|----------------------|
|                                               | No<br>(N = 445385)      | Yes<br>(N = 1234922) |
| Maternal age (yrs)                            |                         |                      |
| < 20                                          | 12579 (2.8)             | 31197 (2.5)          |
| 20-24                                         | 74221 (16.7)            | 276622 (22.4)        |
| 25-29                                         | 141956 (31.9)           | 480019 (38.9)        |
| 30-34                                         | 130725 (29.4)           | 323984 (26.2)        |
| ≥ 35                                          | 85904 (19.3)            | 123100 (10.0)        |
| Maternal height (cm)                          |                         |                      |
| < 155                                         | 12768 (3.4)             | 29254 (2.8)          |
| 155-164                                       | 140380 (37.3)           | 371588 (36.2)        |
| 165-174                                       | 192298 (51.1)           | 541068 (52.6)        |
| ≥175                                          | 30670 (8.2)             | 85836 (8.4)          |
| Missing                                       | 69269 (15.6)            | 207176 (16.8)        |
| Maternal body mass index (kg/m <sup>2</sup> ) |                         |                      |
| < 18.5                                        | 16652 (5.1)             | 41888 (5.0)          |
| 18.5–24.9                                     | 232724 (71.7)           | 594693 (70.8)        |
| 25.0–29.9                                     | 57607 (17.8)            | 155425 (18.5)        |
| ≥30.0                                         | 17461 (5.4)             | 48219 (5.7)          |
| Missing                                       | 120941 (27.2)           | 394697 (32.0)        |
| Maternal parity                               |                         |                      |
| Nulliparous                                   | 244771 (55.0)           | 449039 (36.4)        |
| 1                                             | 112101 (25.2)           | 495704 (40.1)        |
| 2                                             | 64656 (14.5)            | 201190 (16.3)        |
| ≥3                                            | 23857 (5.4)             | 88989 (7.2)          |
| Maternal education                            |                         |                      |
| Compulsory up to 9 years                      | 81147 (19.1)            | 206266 (17.0)        |
| Secondary                                     | 220847 (51.9)           | 672551 (55.5)        |
| Post-secondary                                | 123916 (29.1)           | 332752 (27.5)        |
| Missing                                       | 19475 (4.4)             | 23353 (1.9)          |
| Maternal occupational classification          |                         |                      |
| Low                                           | 244590 (54.9)           | 726565 (58.8)        |
| Intermediate                                  | 89089 (20.0)            | 238929 (19.3)        |
| High                                          | 85545 (19.2)            | 225532 (18.3)        |
| Missing                                       | 26161 (5.9)             | 43896 (3.6)          |
| Maternal marital status                       |                         |                      |
| Unmarried                                     | 179007 (41.3)           | 472895 (38.6)        |
| Married                                       | 230104 (53.1)           | 707752 (57.8)        |
| Divorced/widow(er)                            | 24635 (5.7)             | 43983 (3.6)          |
| Missing                                       | 11639 (2.6)             | 10292 (0.8)          |
| Paternal education                            |                         |                      |
| Compulsory up to 9 years                      | 93861 (22.3)            | 242406 (20.2)        |
| Secondary                                     | 211880 (50.4)           | 640869 (53.3)        |
| Post-secondary                                | 114662 (27.3)           | 319564 (26.6)        |
| Missing                                       | 24982 (5.6)             | 32083 (2.6)          |
| Paternal occupational classification          |                         |                      |
| Low                                           | 259288 (58.2)           | 778326 (63.0)        |
| Intermediate                                  | 53999 (12.1)            | 149005 (12.1)        |
| High                                          | 104176 (23.4)           | 269050 (21.8)        |
| Missing                                       | 27922 (6.3)             | 38541 (3.1)          |

**Supplementary Table 13. Continued**

| <b>Infant characteristics</b>                 | <b>Offspring with siblings</b> |                              |
|-----------------------------------------------|--------------------------------|------------------------------|
|                                               | <b>No<br/>(N = 445385)</b>     | <b>Yes<br/>(N = 1234922)</b> |
| Sex                                           |                                |                              |
| Male                                          | 228386 (51.3)                  | 635252 (51.4)                |
| Female                                        | 216999 (48.7)                  | 599670 (48.6)                |
| Birth weight (g)                              |                                |                              |
| Mean, SD                                      | 3486 (572)                     | 3556 (549)                   |
| Missing                                       | 0.5 (2221)                     | 0.3 (3678)                   |
| Gestational age at birth (weeks)              |                                |                              |
| Mean, SD                                      | 39.3 (1.9)                     | 39.4 (1.8)                   |
| Missing                                       | 0.1 (334)                      | 0.1 (662)                    |
| Small for gestational age (< 10th percentile) |                                |                              |
| No                                            | 391146 (88.3)                  | 1117871 (90.8)               |
| Yes                                           | 51693 (11.7)                   | 112732 (9.2)                 |
| Missing                                       | 2546 (0.6)                     | 4319 (0.3)                   |

Abbreviation: SD = standard deviation. Occupational classification was defined using an approximation of the European Socio-economic Classification (ESeC) and grouped into lower, intermediate and higher level professions.

**Supplementary Table 14.** Maternal smoking during pregnancy and risk of bone fractures in offspring by attained age – whole cohort analyses in offspring with and without siblings.

|                           | <b>Model 2 – offspring with siblings</b> |                     | <b>Model 2 – offspring without siblings</b> |                     |
|---------------------------|------------------------------------------|---------------------|---------------------------------------------|---------------------|
| <b>Attained age</b>       | <b>N all /fractures</b>                  | <b>HR (95% CI)</b>  | <b>N all / fractures</b>                    | <b>HR (95% CI)</b>  |
| <b>0 to &lt; 1 year</b>   |                                          |                     |                                             |                     |
| Smoking                   |                                          |                     |                                             |                     |
| No                        | 645987 / 814                             | REF (1.00)          | 227926 / 258                                | REF (1.00)          |
| Yes                       | 164034 / 269                             | 1.25 (1.08 to 1.45) | 72834 / 105                                 | 1.32 (1.03 to 1.69) |
| No. of cigarettes/day     |                                          |                     |                                             |                     |
| None                      | 645987 / 814                             | REF (1.00)          | 227926 / 258                                | REF (1.00)          |
| 1-9 cigarettes/day        | 103631 / 158                             | 1.18 (0.99 to 1.41) | 46224 / 63                                  | 1.23 (0.92 to 1.65) |
| ≥ 10 cigarettes/day       | 60403 / 111                              | 1.38 (1.12 to 1.70) | 26610 / 42                                  | 1.49 (1.06 to 2.11) |
| <i>P</i> trend            |                                          | 0.001               |                                             | 0.01                |
| <b>1 to &lt; 5 years</b>  |                                          |                     |                                             |                     |
| Smoking                   |                                          |                     |                                             |                     |
| No                        | 642606 / 8163                            | REF (1.00)          | 227051 / 3844                               | REF (1.00)          |
| Yes                       | 162875 / 1625                            | 0.99 (0.93 to 1.04) | 72555 / 740                                 | 0.91 (0.84 to 0.99) |
| No. of cigarettes/day     |                                          |                     |                                             |                     |
| None                      | 642606 / 8163                            | REF (1.00)          | 227051 / 3844                               | REF (1.00)          |
| 1-9 cigarettes/day        | 102970 / 999                             | 0.96 (0.90 to 1.03) | 46062 / 503                                 | 0.91 (0.82 to 1.00) |
| ≥ 10 cigarettes/day       | 59905 / 626                              | 1.03 (0.94 to 1.12) | 26493 / 237                                 | 0.92 (0.80 to 1.05) |
| <i>P</i> trend            |                                          | 0.97                |                                             | 0.05                |
| <b>5 to &lt; 15 years</b> |                                          |                     |                                             |                     |
| Smoking                   |                                          |                     |                                             |                     |
| No                        | 629581 / 89554                           | REF (1.00)          | 220648 / 28802                              | REF (1.00)          |
| Yes                       | 160443 / 20032                           | 1.07 (1.05 to 1.09) | 71336 / 7692                                | 1.07 (1.04 to 1.10) |
| No. of cigarettes/day     |                                          |                     |                                             |                     |
| No                        | 629581 / 89554                           | REF (1.00)          | 220648 / 28802                              | REF (1.00)          |
| 1-9 cigarettes/day        | 101465 / 12642                           | 1.06 (1.04 to 1.08) | 45241 / 5117                                | 1.06 (1.03 to 1.10) |
| ≥ 10 cigarettes/day       | 58978 / 7390                             | 1.08 (1.05 to 1.10) | 26095 / 2575                                | 1.08 (1.03 to 1.13) |
| <i>P</i> trend            |                                          | < 0.001             |                                             | < 0.001             |
| <b>≥ 15 years</b>         |                                          |                     |                                             |                     |
| Smoking                   |                                          |                     |                                             |                     |
| No                        | 508446 / 50404                           | REF (1.00)          | 167118 / 15597                              | REF (1.00)          |
| Yes                       | 135750 / 17431                           | 1.09 (1.07 to 1.11) | 60117 / 7992                                | 1.14 (1.11 to 1.17) |
| No. of cigarettes/day     |                                          |                     |                                             |                     |
| No                        | 508446 / 50404                           | REF (1.00)          | 167118 / 15597                              | REF (1.00)          |
| 1-9 cigarettes/day        | 85807 / 10903                            | 1.08 (1.06 to 1.11) | 37537 / 4848                                | 1.14 (1.10 to 1.18) |
| ≥ 10 cigarettes/day       | 49943 / 6528                             | 1.11 (1.08 to 1.14) | 22580 / 3144                                | 1.14 (1.10 to 1.19) |
| <i>P</i> trend            |                                          | < 0.001             |                                             | < 0.001             |

Hazard ratios (with 95% confidence intervals) for bone fractures comparing offspring exposed to maternal smoking during pregnancy (any, 1-9 cigarettes/day,  $\geq 10$  cigarettes day) to those unexposed (= reference group) – analyses in offspring with and without siblings. Hazard ratios are presented by attained age (0 to < 1 year, 1 to < 5 years, 5 to < 15 years,  $\geq 15$  years) for model 2: whole cohort analysis adjusted for birth year, offspring sex, maternal age, parity, height, body mass index, parental education, occupation and marital status. Abbreviations: HR = hazard ratio; CI = confidence interval.

**Supplementary Table 15.** Maternal smoking during pregnancy and risk of bone fractures in offspring by attained age – within-sibship analyses including full siblings only.

|                           | <b>Model 6</b>            |                     |
|---------------------------|---------------------------|---------------------|
| <b>Attained age</b>       | <b>N all /fractures *</b> | <b>HR (95% CI)</b>  |
| <b>0 to &lt; 1 year</b>   |                           |                     |
| Smoking                   |                           |                     |
| No                        | 90 / 31                   | REF (1.00)          |
| Yes                       | 86 / 44                   | 1.49 (0.91 to 2.46) |
| No. of cigarettes/day     |                           |                     |
| None                      | 90 / 31                   | REF (1.00)          |
| 1-9 cigarettes/day        | 62 / 33                   | 1.43 (0.85 to 2.38) |
| ≥ 10 cigarettes/day       | 24 / 11                   | 1.75 (0.91 to 3.34) |
| <i>P</i> trend            |                           | 0.09                |
| <b>1 to &lt; 5 years</b>  |                           |                     |
| Smoking                   |                           |                     |
| No                        | 716 / 350                 | REF (1.00)          |
| Yes                       | 702 / 254                 | 1.01 (0.84 to 1.22) |
| No. of cigarettes/day     |                           |                     |
| None                      | 716 / 350                 | REF (1.00)          |
| 1-9 cigarettes/day        | 546 / 198                 | 0.97 (0.80 to 1.17) |
| ≥ 10 cigarettes/day       | 156 / 56                  | 1.20 (0.93 to 1.56) |
| <i>P</i> trend            |                           | 0.26                |
| <b>5 to &lt; 15 years</b> |                           |                     |
| Smoking                   |                           |                     |
| No                        | 6436 / 3109               | REF (1.00)          |
| Yes                       | 6307 / 2621               | 1.03 (0.97 to 1.09) |
| No. of cigarettes/day     |                           |                     |
| No                        | 6436 / 3109               | REF (1.00)          |
| 1-9 cigarettes/day        | 4904 / 2069               | 1.03 (0.98 to 1.10) |
| ≥ 10 cigarettes/day       | 1403 / 552                | 1.00 (0.92 to 1.08) |
| <i>P</i> trend            |                           | 0.82                |
| <b>≥ 15 years</b>         |                           |                     |
| Smoking                   |                           |                     |
| No                        | 4043 / 1739               | REF (1.00)          |
| Yes                       | 3984 / 1859               | 0.95 (0.88 to 1.03) |
| No. of cigarettes/day     |                           |                     |
| No                        | 4043 / 1739               | REF (1.00)          |
| 1-9 cigarettes/day        | 3066 / 1447               | 0.94 (0.87 to 1.02) |
| ≥ 10 cigarettes/day       | 918 / 412                 | 0.98 (0.88 to 1.08) |
| <i>P</i> trend            |                           | 0.58                |

Hazard ratios (with 95% confidence intervals) for bone fractures comparing offspring exposed to maternal smoking during pregnancy (any, 1-9 cigarettes/day,  $\geq 10$  cigarettes day) to those unexposed (= reference group) – analyses including full siblings only. Hazard ratios are presented by attained age (0 to < 1 year, 1 to < 5 years, 5 to < 15 years,  $\geq 15$  years) for model 6: within-sibship analysis including full siblings only with adjustment for birth year, offspring sex, maternal age, parity, body mass index, parental education, occupation and marital status. \* The within-sibship analysis model includes all offspring with full siblings, but only families who are discordant on both the exposure and outcome contribute to the estimation of the hazard ratio. The numbers presented in the table therefore refer to the total number of offspring with full siblings discordant on bone fractures and maternal smoking during pregnancy. Abbreviations: HR = hazard ratio; CI = confidence interval.

**Supplementary Table 16.** Maternal smoking during pregnancy and risk of bone fractures in offspring by attained age – whole cohort analyses stratified by calendar period of birth.

|                           | <b>Model 2 - 1983-1991 birth cohort</b> |                     | <b>Model 2- 1992-2000 birth cohort</b> |                     |                      |
|---------------------------|-----------------------------------------|---------------------|----------------------------------------|---------------------|----------------------|
| <b>Attained age</b>       | <b>N all / fractures</b>                | <b>HR (95% CI)</b>  | <b>N all / fractures</b>               | <b>HR (95% CI)</b>  | <b>P interaction</b> |
| <b>0 to &lt; 1 year</b>   |                                         |                     |                                        |                     |                      |
| Smoking                   |                                         |                     |                                        |                     |                      |
| No                        | 322801 / 331                            | REF (1.00)          | 551112 / 741                           | REF (1.00)          | 0.27                 |
| Yes                       | 128134 / 188                            | 1.36 (1.13 to 1.65) | 108734 / 186                           | 1.20 (1.01 to 1.43) |                      |
| No. of cigarettes/day     |                                         |                     |                                        |                     |                      |
| None                      | 322801 / 331                            | REF (1.00)          | 551112 / 741                           | REF (1.00)          | 0.54                 |
| 1-9 cigarettes/day        | 79478 / 110                             | 1.30 (1.04 to 1.62) | 70377 / 111                            | 1.12 (0.91 to 1.38) |                      |
| ≥ 10 cigarettes/day       | 48656 / 78                              | 1.48 (1.14 to 1.92) | 38357 / 75                             | 1.36 (1.06 to 1.74) |                      |
| P trend                   |                                         | < 0.001             |                                        | 0.01                |                      |
| <b>1 to &lt; 5 years</b>  |                                         |                     |                                        |                     |                      |
| Smoking                   |                                         |                     |                                        |                     |                      |
| No                        | 321245 / 1881                           | REF (1.00)          | 548412 / 10126                         | REF (1.00)          | 0.01                 |
| Yes                       | 127406 / 795                            | 1.00 (0.91 to 1.09) | 108024 / 1570                          | 0.94 (0.89 to 0.99) |                      |
| No. of cigarettes/day     |                                         |                     |                                        |                     |                      |
| None                      | 321245 / 1881                           | REF (1.00)          | 548412 / 10126                         | REF (1.00)          | 0.05                 |
| 1-9 cigarettes/day        | 79067 / 478                             | 0.97 (0.88 to 1.08) | 69965 / 1024                           | 0.93 (0.87 to 0.99) |                      |
| ≥ 10 cigarettes/day       | 48339 / 317                             | 1.03 (0.91 to 1.17) | 38059 / 546                            | 0.96 (0.88 to 1.05) |                      |
| P trend                   |                                         | 0.81                |                                        | 0.08                |                      |
| <b>5 to &lt; 15 years</b> |                                         |                     |                                        |                     |                      |
| Smoking                   |                                         |                     |                                        |                     |                      |
| No                        | 317997 / 17491                          | REF (1.00)          | 532232 / 100865                        | REF (1.00)          | 0.12                 |
| Yes                       | 126154 / 7169                           | 1.08 (1.04 to 1.11) | 105625 / 20555                         | 1.07 (1.05 to 1.08) |                      |
| No. of cigarettes/day     |                                         |                     |                                        |                     |                      |
| None                      | 317997 / 17491                          | REF (1.00)          | 532232 / 100865                        | REF (1.00)          | 0.06                 |
| 1-9 cigarettes/day        | 78326 / 4384                            | 1.06 (1.02 to 1.09) | 68380 / 13375                          | 1.07 (1.05 to 1.09) |                      |
| ≥ 10 cigarettes/day       | 47828 / 2785                            | 1.11 (1.06 to 1.16) | 37245 / 7180                           | 1.07 (1.04 to 1.09) |                      |
| P trend                   |                                         | < 0.001             |                                        | < 0.001             |                      |
| <b>≥ 15 years</b>         |                                         |                     |                                        |                     |                      |
| Smoking                   |                                         |                     |                                        |                     |                      |
| No                        | 295521 / 41940                          | REF (1.00)          | 380043 / 24061                         | REF (1.00)          | < 0.001              |
| Yes                       | 117654 / 19451                          | 1.12 (1.10 to 1.14) | 78213 / 5972                           | 1.06 (1.03 to 1.10) |                      |
| No. of cigarettes/day     |                                         |                     |                                        |                     |                      |
| None                      | 295521 / 41940                          | REF (1.00)          | 380043 / 24061                         | REF (1.00)          | < 0.001              |
| 1-9 cigarettes/day        | 73096 / 11955                           | 1.11 (1.09 to 1.14) | 50248 / 3796                           | 1.07 (1.03 to 1.10) |                      |
| ≥ 10 cigarettes/day       | 44558 / 7496                            | 1.14 (1.11 to 1.17) | 27965 / 2176                           | 1.06 (1.01 to 1.11) |                      |
| P trend                   |                                         | < 0.001             |                                        | < 0.001             |                      |

Hazard ratios (with 95% confidence intervals) for bone fractures comparing offspring exposed to maternal smoking during pregnancy (any, 1-9 cigarettes/day,  $\geq 10$  cigarettes day) to those unexposed (= reference group) – analyses stratified by calendar period of birth. Hazard ratios are presented by attained age (0 to < 1 year, 1 to < 5 years, 5 to < 15 years,  $\geq 15$  years) for model 2: whole cohort analysis adjusted for birth year, offspring sex, maternal age, parity, height, body mass index, parental education, occupation and marital status. Abbreviations: HR = hazard ratio; CI = confidence interval.



**Supplementary Table 17.** Maternal smoking during pregnancy and risk of bone fractures in offspring by attained age – within-sibship analyses stratified by calendar period of birth.

|                           | <b>Model 3 - 1983-1991 birth cohort</b> |                     | <b>Model 3 - 1992-2000 birth cohort</b> |                     |                      |
|---------------------------|-----------------------------------------|---------------------|-----------------------------------------|---------------------|----------------------|
| <b>Attained age</b>       | <b>N all / fractures *</b>              | <b>HR (95% CI)</b>  | <b>N all / fractures *</b>              | <b>HR (95% CI)</b>  | <b>P interaction</b> |
| <b>0 to &lt; 1 year</b>   |                                         |                     |                                         |                     |                      |
| Smoking                   |                                         |                     |                                         |                     |                      |
| No                        | 23 / 10                                 | REF (1.00)          | 46 / 18                                 | REF (1.00)          | 0.68                 |
| Yes                       | 25 / 13                                 | 1.30 (0.51 to 3.33) | 42 / 22                                 | 1.29 (0.61 to 2.72) |                      |
| No. of cigarettes/day     |                                         |                     |                                         |                     |                      |
| None                      | 23 / 10                                 | REF (1.00)          | 46 / 18                                 | REF (1.00)          | 0.61                 |
| 1-9 cigarettes/day        | 18 / 9                                  | 1.29 (0.49 to 3.41) | 34 / 19                                 | 1.23 (0.58 to 2.62) |                      |
| ≥ 10 cigarettes/day       | 7 / 4                                   | 1.32 (0.43 to 4.10) | 8 / 3                                   | 1.82 (0.58 to 5.74) |                      |
| <i>P</i> trend            |                                         | 0.65                |                                         | 0.32                |                      |
| <b>1 to &lt; 5 years</b>  |                                         |                     |                                         |                     |                      |
| Smoking                   |                                         |                     |                                         |                     |                      |
| No                        | 121 / 55                                | REF (1.00)          | 486 / 271                               | REF (1.00)          | 0.33                 |
| Yes                       | 125 / 60                                | 1.11 (0.76 to 1.62) | 476 / 167                               | 0.97 (0.77 to 1.22) |                      |
| No. of cigarettes/day     |                                         |                     |                                         |                     |                      |
| None                      | 121 / 55                                | REF (1.00)          | 486 / 271                               | REF (1.00)          | 0.58                 |
| 1-9 cigarettes/day        | 98 / 50                                 | 1.06 (0.72 to 1.57) | 380 / 132                               | 0.94 (0.74 to 1.19) |                      |
| ≥ 10 cigarettes/day       | 27 / 10                                 | 1.30 (0.78 to 2.16) | 96 / 35                                 | 1.11 (0.80 to 1.54) |                      |
| <i>P</i> trend            |                                         | 0.33                |                                         | 0.72                |                      |
| <b>5 to &lt; 15 years</b> |                                         |                     |                                         |                     |                      |
| Smoking                   |                                         |                     |                                         |                     |                      |
| No                        | 944 / 474                               | REF (1.00)          | 3996 / 1995                             | REF (1.00)          | 0.37                 |
| Yes                       | 925 / 407                               | 1.07 (0.93 to 1.24) | 3952 / 1774                             | 0.99 (0.92 to 1.05) |                      |
| No. of cigarettes/day     |                                         |                     |                                         |                     |                      |
| None                      | 944 / 474                               | REF (1.00)          | 3996 / 1995                             | REF (1.00)          | 0.59                 |
| 1-9 cigarettes/day        | 698 / 314                               | 1.09 (0.94 to 1.27) | 3128 / 1398                             | 0.99 (0.92 to 1.06) |                      |
| ≥ 10 cigarettes/day       | 227 / 93                                | 1.02 (0.84 to 1.23) | 824 / 376                               | 0.98 (0.89 to 1.07) |                      |
| <i>P</i> trend            |                                         | 0.84                |                                         | 0.60                |                      |
| <b>≥ 15 years</b>         |                                         |                     |                                         |                     |                      |
| Smoking                   |                                         |                     |                                         |                     |                      |
| No                        | 2008 / 989                              | REF (1.00)          | 885 / 357                               | REF (1.00)          | 0.89                 |
| Yes                       | 1994 / 927                              | 0.94 (0.86 to 1.04) | 861 / 467                               | 0.92 (0.77 to 1.10) |                      |
| No. of cigarettes/day     |                                         |                     |                                         |                     |                      |
| None                      | 2008 / 989                              | REF (1.00)          | 885 / 357                               | REF (1.00)          | 0.79                 |
| 1-9 cigarettes/day        | 1528 / 709                              | 0.94 (0.84 to 1.04) | 689 / 376                               | 0.92 (0.77 to 1.11) |                      |
| ≥ 10 cigarettes/day       | 466 / 218                               | 0.98 (0.86 to 1.11) | 172 / 91                                | 0.91 (0.72 to 1.15) |                      |
| <i>P</i> trend            |                                         | 0.68                |                                         | 0.42                |                      |

Hazard ratios (with 95% confidence intervals) for bone fractures comparing offspring exposed to maternal smoking during pregnancy (any, 1-9 cigarettes/day,  $\geq 10$  cigarettes day) to those unexposed (= reference group) – analyses stratified by calendar period of birth. Hazard ratios are presented by attained age (0 to < 1 year, 1 to < 5 years, 5 to < 15 years,  $\geq 15$  years) for model 3: within-sibship analysis adjusted for birth year, offspring sex, maternal age, parity, body mass index, parental education, occupation and marital status.\* The within-sibship analysis model includes all offspring with siblings, but only families who are discordant on both the exposure and outcome contribute to the estimation of the hazard ratio. The numbers presented in the table therefore refer to the total number of offspring with siblings discordant on bone fractures and maternal smoking during pregnancy. Abbreviations: HR = hazard ratio; CI = confidence interval.

**Supplementary Table 18.** Maternal smoking during pregnancy and risk of bone fractures in offspring by attained age – whole cohort and within-sibship analyses after imputation of missing covariate data.

|                           | <b>Model 2</b>          |                     | <b>Model 3</b>             |                     |
|---------------------------|-------------------------|---------------------|----------------------------|---------------------|
| <b>Attained age</b>       | <b>N all /fractures</b> | <b>HR (95% CI)</b>  | <b>N all / fractures *</b> | <b>HR (95% CI)</b>  |
| <b>0 to &lt; 1 year</b>   |                         |                     |                            |                     |
| Smoking                   |                         |                     |                            |                     |
| No                        | 1302940 / 1669          | REF (1.00)          | 266 / 86                   | REF (1.00)          |
| Yes                       | 377367 / 584            | 1.19 (1.08 to 1.32) | 260 / 105                  | 1.44 (1.05 to 2.00) |
| No. of cigarettes/day     |                         |                     |                            |                     |
| None                      | 1302940 / 1669          | REF (1.00)          | 266 / 86                   | REF (1.00)          |
| 1-9 cigarettes/day        | 236094 / 348            | 1.14 (1.01 to 1.29) | 186 / 75                   | 1.48 (1.06 to 2.07) |
| ≥ 10 cigarettes/day       | 141273 / 236            | 1.28 (1.11 to 1.48) | 74 / 30                    | 1.33 (0.89 to 2.00) |
| <i>P</i> trend            |                         | < 0.001             |                            | 0.17                |
| <b>1 to &lt; 5 years</b>  |                         |                     |                            |                     |
| Smoking                   |                         |                     |                            |                     |
| No                        | 1292632 / 15683         | REF (1.00)          | 1870 / 819                 | REF (1.00)          |
| Yes                       | 373599 / 3395           | 0.97 (0.93 to 1.00) | 1830 / 575                 | 0.95 (0.84 to 1.07) |
| No. of cigarettes/day     |                         |                     |                            |                     |
| None                      | 1292632 / 15683         | REF (1.00)          | 1870 / 819                 | REF (1.00)          |
| 1-9 cigarettes/day        | 233897 / 2150           | 0.96 (0.91 to 1.00) | 1374 / 433                 | 0.94 (0.83 to 1.06) |
| ≥ 10 cigarettes/day       | 139702 / 1245           | 0.98 (0.92 to 1.04) | 456 / 142                  | 0.97 (0.82 to 1.14) |
| <i>P</i> trend            |                         | 0.17                |                            | 0.63                |
| <b>5 to &lt; 15 years</b> |                         |                     |                            |                     |
| Smoking                   |                         |                     |                            |                     |
| No                        | 1258379 / 167585        | REF (1.00)          | 18942 / 8481               | REF (1.00)          |
| Yes                       | 365874 / 43476          | 1.08 (1.07 to 1.09) | 18712 / 7221               | 1.02 (0.98 to 1.05) |
| No. of cigarettes/day     |                         |                     |                            |                     |
| None                      | 1258379 / 167585        | REF (1.00)          | 18942 / 8481               | REF (1.00)          |
| 1-9 cigarettes/day        | 229015 / 27554          | 1.07 (1.06 to 1.09) | 14091 / 5509               | 1.02 (0.98 to 1.05) |
| ≥ 10 cigarettes/day       | 136859 / 15922          | 1.09 (1.07 to 1.10) | 4621 / 1712                | 1.01 (0.96 to 1.06) |
| <i>P</i> trend            |                         | < 0.001             |                            | 0.60                |
| <b>≥ 15 years</b>         |                         |                     |                            |                     |
| Smoking                   |                         |                     |                            |                     |
| No                        | 1015792 / 104435        | REF (1.00)          | 12700 / 5048               | REF (1.00)          |
| Yes                       | 310479 / 41143          | 1.11 (1.09 to 1.12) | 12617 / 5648               | 1.00 (0.95 to 1.04) |
| No. of cigarettes/day     |                         |                     |                            |                     |
| No                        | 1015792 / 104435        | REF (1.00)          | 12700 / 5048               | REF (1.00)          |
| 1-9 cigarettes/day        | 193498 / 25122          | 1.10 (1.08 to 1.11) | 9432 / 4275                | 0.99 (0.95 to 1.04) |
| ≥ 10 cigarettes/day       | 116981 / 16021          | 1.13 (1.11 to 1.15) | 3185 / 1373                | 1.01 (0.95 to 1.07) |
| <i>P</i> trend            |                         | < 0.001             |                            | 0.84                |

Hazard ratios (with 95% confidence intervals) for bone fractures comparing offspring exposed to maternal smoking during pregnancy (any, 1-9 cigarettes/day,  $\geq 10$  cigarettes day) to those unexposed (= reference group) – analyses after multiple imputation of missing covariate data. Hazard ratios are presented by attained age (0 to < 1 year, 1 to < 5 years, 5 to < 15 years,  $\geq 15$  years) and for the different analysis models: model 2: whole cohort analysis adjusted for birth year, offspring sex, maternal age, parity, height, body mass index, parental education, occupation and marital status; and model 3: within-sibship analysis including all covariates included in model 2 except for maternal height, a variable which is unlikely to vary among siblings in the same family. \* The within-sibship analysis model includes all offspring with siblings, but only families who are also discordant on both the exposure and outcome contribute to the estimation of the hazard ratio. The numbers presented in the table therefore refer to the total number of offspring with siblings discordant on bone fractures and maternal smoking during pregnancy. Abbreviations: HR = hazard ratio; CI = confidence interval.
